# Supplementary material for: ALS-related p97 R155H mutation disrupts lysophagy in iPSC-derived motor neurons
Source: PubMed Central journal article supplement — Stem Cell Reports. 2024 Feb 8;19(3):366–82. doi: 10.1016/j.stemcr.2024.01.002 (PMC10937112; doi:10.1016/j.stemcr.2024.01.002), 2024-02-08
Supplement: mmc3.pdf [file mmc3.pdf]

# ALS-related p97 R155H mutation disrupts lysophagy in iPSC-derived motor neurons

Jacob A. Klickstein,<sup>1</sup> Michelle A. Johnson,<sup>1,5</sup> Pantelis Antonoudiou,<sup>2</sup> Jamie Maguire,<sup>2</sup> Joao A. Paulo,<sup>3</sup> Steve P. Gygi,<sup>3</sup> Chris Wehl,<sup>4</sup> and Malavika Raman<sup>1,\*</sup>

<sup>1</sup>Department of Developmental Molecular and Chemical Biology, Tufts University School of Medicine, Boston, MA

<sup>2</sup>Department of Neuroscience, Tufts University School of Medicine, Boston, MA

<sup>3</sup>Department of Cell Biology, Harvard Medical School, Boston, MA

<sup>4</sup>Department of Neurology, Washington University at St. Louis, St. Louis, MO

<sup>5</sup>Present address, Department of Neuroscience, Oberlin College, Oberlin, OH

\*Correspondence: [malavika.raman@tufts.edu](mailto:malavika.raman@tufts.edu)

<https://doi.org/10.1016/j.stemcr.2024.01.002>

## SUMMARY

Mutations in the AAA+ ATPase p97 cause multisystem proteinopathy 1, which includes amyotrophic lateral sclerosis; however, the pathogenic mechanisms that contribute to motor neuron loss remain obscure. Here, we use two induced pluripotent stem cell models differentiated into spinal motor neurons to investigate how p97 mutations perturb the motor neuron proteome. Using quantitative proteomics, we find that motor neurons harboring the p97 R155H mutation have deficits in the selective autophagy of lysosomes (lysophagy). p97 R155H motor neurons are unable to clear damaged lysosomes and have reduced viability. Lysosomes in mutant motor neurons have increased pH compared with wild-type cells. The clearance of damaged lysosomes involves UBXD1-p97 interaction, which is disrupted in mutant motor neurons. Finally, inhibition of the ATPase activity of p97 using the inhibitor CB-5083 rescues lysophagy defects in mutant motor neurons. These results add to the evidence that endo-lysosomal dysfunction is a key aspect of disease pathogenesis in p97-related disorders.

## INTRODUCTION

p97 (also known as valosin containing protein, VCP) is an evolutionarily conserved type II AAA+ ATPase with important roles in ubiquitin-dependent protein quality control. p97 is ubiquitously expressed and forms a homohexamer wherein each monomer is composed of two ATPase domains (D1 and D2) as well as an N-terminal regulatory domain (NTD) (DeLaBarre and Brunger, 2003). ATP hydrolysis by p97 has been demonstrated to enable substrate unfolding by threading the ubiquitylated substrate through the central pore of the hexamer (Cooney et al., 2019; Twomey et al., 2019). This “unfoldase” activity is suited for the extraction of substrates from membranes and multi-protein complexes prior to proteasomal degradation (Ye et al., 2017). Key to p97 function and specificity is its ability to form distinct complexes with a host of adaptor proteins. Over 40 adaptors have been identified that enable p97 recruitment to ubiquitylated substrates (Buchberger et al., 2015). We and others have shown that p97-adaptor complexes are important for many cellular processes including regulation of organelle contact (Ganji et al., 2023), cell cycle (Kochenova et al., 2022), DNA damage response (Franz et al., 2016), and autophagy (van den Boom and Meyer, 2018) (see Ahlstedt et al., 2022; van den Boom and Meyer, 2018 for review). Thus, loss of p97 impacts the degradation of a large cohort of the ubiquitin-modified proteome.

In addition to proteasomal degradation, p97 plays an important role in the endo-lysosomal system and auto-

phagy (Krick et al., 2010; Ramanathan and Ye, 2012) with recent reports suggesting a role in lysophagy, the autophagic process of turning over damaged lysosomes (Arhzaouy et al., 2019; Kravić et al., 2022; Papadopoulos et al., 2017). p97 in conjunction with a trimeric adaptor complex composed of the adaptors UBX domain protein 1 (UBXD1), YOD1 deubiquitinase (YOD1), and phospholipase A2 activating protein (PLAA), collectively known as the endo-lysosomal damage repair (ELDR) complex (Papadopoulos et al., 2017), mediates removal of ubiquitylated intermediates on the lysosomal membrane enabling lysophagy (Kravić et al., 2022).

Mutations in p97 cause a heterogeneous disease known as multisystem proteinopathy 1 (MSP-1), which includes Paget’s disease of the bone, inclusion body myopathy, frontotemporal dementia, and amyotrophic lateral sclerosis (ALS) (Johnson et al., 2010; Watts et al., 2004). Tissue from patients with p97 mutations contain TDP-43 and ubiquitin-positive inclusions linking p97-related disease with sporadic forms of these diseases (Neumann et al., 2007). Certain disease-related p97 mutations have increased ATPase activity *in vitro* (Manno et al., 2010); however, whether this translates to a toxic gain-of-function or a dominant negative effect remains debated (Ahlstedt et al., 2022; van den Boom and Meyer, 2018; Franz et al., 2016). The majority of mutations occur in the NTD and N-terminal-D1 linker region, which is important for binding to some classes of adaptors (Pfeffer et al., 2022). Indeed, these mutations alter adaptor binding, with some adaptors

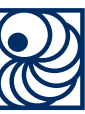

having increased association (e.g., UFD1-NPL4 [Blythe et al., 2019]) and others with decreased association (e.g., UBXD1 [Ritz et al., 2011]). Thus, for some *p97* mutations, there may be loss of targeting to some substrates leading to their accumulation or precocious degradation of others due to increased targeting; however, this has not been exhaustively tested in relevant cell types.

The cellular processes affected by mutant *p97* that lead to disease are still intensely debated. Models in immortalized cell types such as U2OS and NSC-34 have found defects in lysophagy leading to an accumulation of damaged lysosomes and increased cell death (Ferrari et al., 2022; Papadopoulos et al., 2017). *Drosophila* and rodent models of *p97* disease have shown defects in protein degradation, autophagy, and mitochondrial function (Gonzalez and Wang, 2020; Kim et al., 2013; Nalbandian et al., 2012). Induced pluripotent stem cell (iPSC)-derived motor neuron models of *p97* disease have heterogeneous phenotypes as well. Initial studies utilizing iPSC-derived motor neurons from a patient with the R155H mutation found increased levels of TDP-43, ubiquitin, and autophagy-related proteins (Dec et al., 2014). Another study found TDP-43 mislocalization, endoplasmic reticulum (ER) stress induction, and mitochondrial dysfunction in motor neurons from patients carrying the R155C and R191Q mutations (Hall et al., 2017). A recent study used patient-derived iPSCs with R155H mutation and matched wild-type corrected lines and found no changes in ER stress or TDP-43 mislocalization; however, aberrant cell-cycle protein levels were determined to be contributors to decreased viability (Wang et al., 2022).

To begin to understand how *p97* mutations impact the cellular proteome, we performed quantitative proteomics on two distinct *p97* R155H iPSC-derived motor neuron cell lines. The first iPSC line was derived from a patient harboring the R155H mutation that was corrected to the wild-type allele using CRISPR-Cas9 editing. The second iPSC line was created by the iPSC neurodegenerative disease initiative (iNDI), wherein the R155H mutation was introduced into the endogenous *p97* genomic locus of KOLF2.1 cells to create both heterozygous and homozygous lines (Pantazis et al., 2022; Ramos et al., 2021). These two cell-based models allow us to interrogate how the cellular proteome is impacted by *p97* mutation alone (KOLF2.1 lines) as well as how patient-specific genetic backgrounds modify the *p97* R155H phenotype. From proteomic studies, we found that each genetic background had over 200 differentially expressed proteins, but only a few proteins were common between the patient and KOLF2.1 cell lines. For example, KOLF2.1 R155H cells had a pronounced defect in mitochondrial homeostasis; surprisingly, the patient-derived cells did not have this phenotype. An unbiased clustering analysis identified autophagy and lysosomal proteins as the most significantly

altered in both the mutant lines. Of the few commonly altered proteins, we identified multiple components of lysosome repair machinery.

We find that while wild-type motor neurons were able to effectively clear damaged lysosomes following agent L-leucyl leucine-*O*-methyl ester (LLOME) treatment, *p97* mutant neurons were not. Interestingly, while LLOME treatment stimulated the association of wild-type *p97* with UBXD1, this complex was less effectively formed by *p97* R155H, suggesting defective ELDR complex formation. Because mutant *p97* has increased ATPase activity, previous studies have utilized *p97* inhibitors to reverse disease phenotypes (Harley et al., 2021; Wang et al., 2022; Zhang et al., 2017). We co-treated motor neurons with LLOME and CB-5083, a highly specific competitive *p97* inhibitor, and found that inhibition of mutant *p97* rescued lysophagy defects and prevented LLOME-induced cell death. Overall, our studies suggest that *p97* R155H mutation negatively impacts lysosome quality control in human motor neurons.

## RESULTS

### Differentiation of two isogenic iPSC *p97* R155H models into functional motor neurons

We used two orthogonal models to investigate how the *p97* R155H mutation impacted the motor neuron proteome. The first was a wild-type KOLF2.1 iPSC line that was CRISPR edited to introduce the R155H mutation into the endogenous *p97* locus that was developed by iNDI (Pantazis et al., 2022) (Figure 1A). We used two clonal lines (heterozygous and homozygous mutants) for our studies (referred to as KOLF2.1 wild-type, heterozygous, and homozygous). The second was the 392.1 iPSC line from a 48-year-old male diagnosed with ALS, dementia, and Paget's disease, harboring the *p97* R155H mutation. The R155H mutation was reverted to wild-type by CRISPR/Cas9 editing (referred to as 392.1 wild-type and R155H) (Figure 1A). Genotypes for both cell lines were confirmed by DNA sequencing (Figures S1A and S2A). A normal karyotype was confirmed for parental lines (Figures S1B and S2B). Wild-type and mutant iPSCs were indistinguishable from each other in colony morphology, the ability to form embryoid bodies, and the expression of pluripotency markers (Figures 1B, S1C, S2C, and S2D). We established a spinal motor neuron differentiation protocol using previous studies (Du et al., 2015; Qu et al., 2014; Shimojo et al., 2015). iPSCs were induced to neural ectoderm fate using dual-SMAD inhibition and a WNT pathway agonist (Figure 1C). After 3 days, retinoic acid (RA) and smoothed agonist (SAG, an activator of the SHH pathway) were added to create NES+, SOX2+, PAX6+ neural precursor

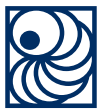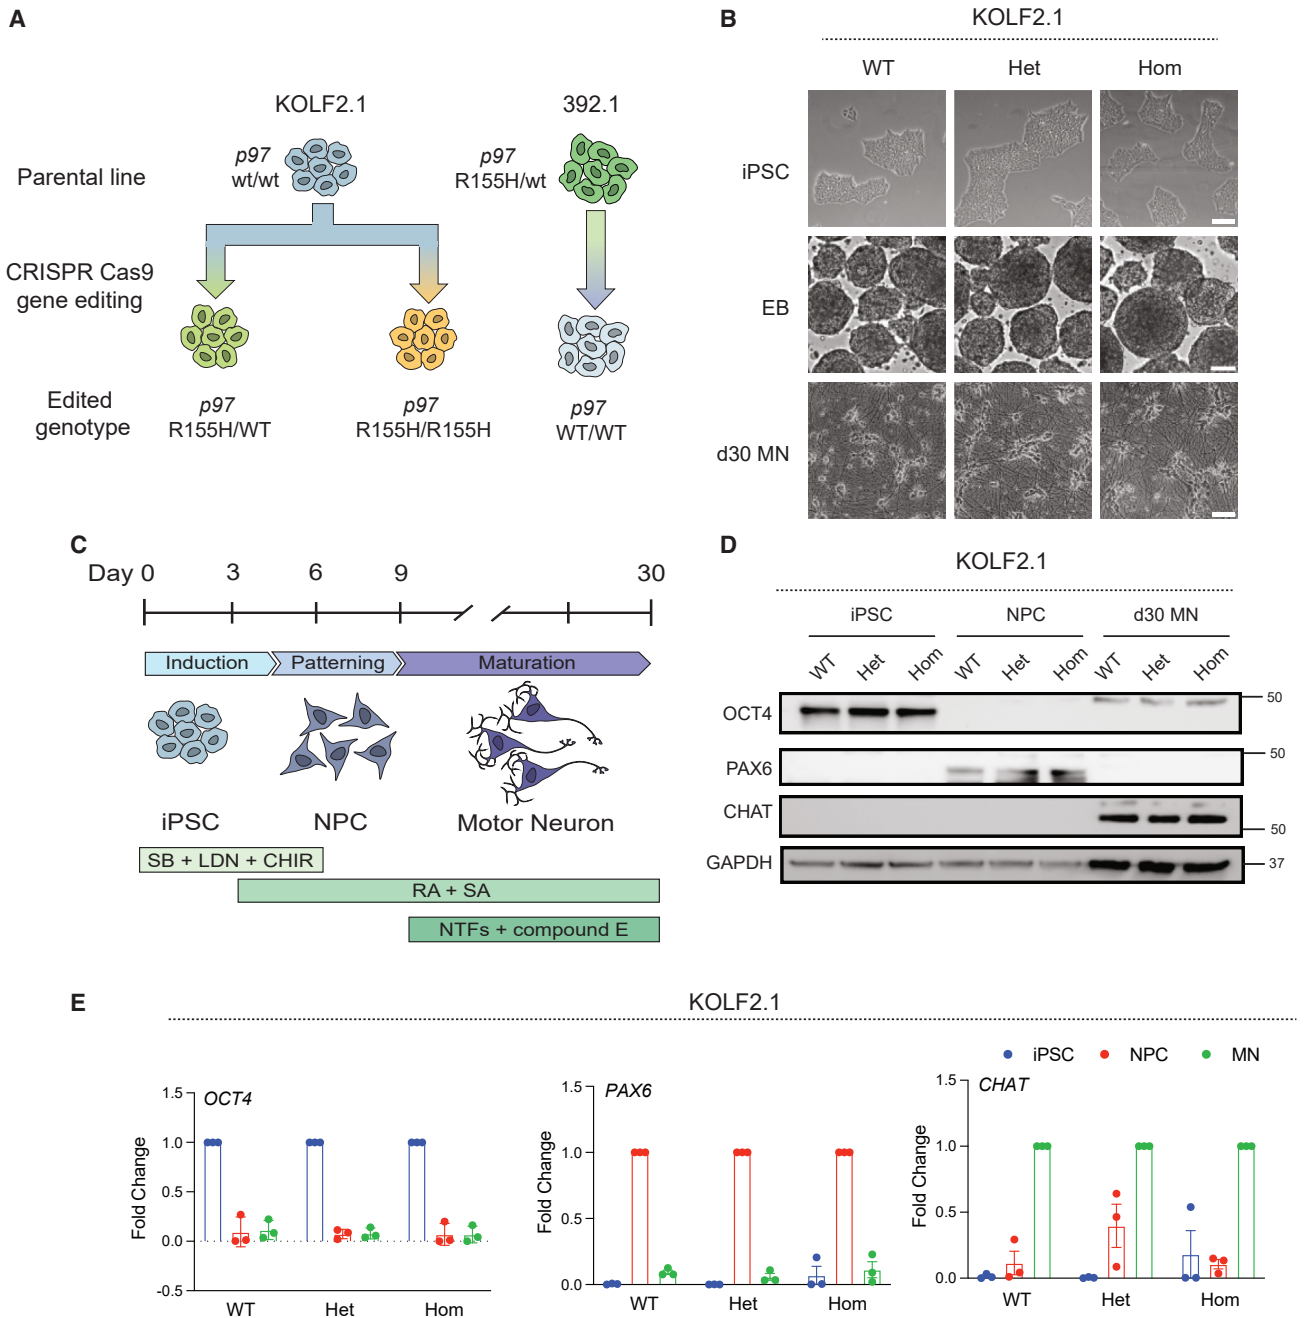

**Figure 1. Characterization of iPSC-derived motor neurons**

(A) Two isogenic iPSC models were generated using gene editing to introduce the R155H mutation into the *p97* endogenous locus (KOLF2.1) and correct the R155H mutation (392.1) to wild type.

(B) Phase contrast images of iPSCs (top row), embryoid bodies (middle row), and day 30 motor neurons (bottom row). Scale bars, 50  $\mu$ m (top and bottom rows) and 100  $\mu$ m (middle row).

(C) Schematic of the motor neuron differentiation protocol.

(D) Immunoblot of iPSCs, NPCs, and day 30 motor neurons. The faster migration band in PAX6 immunoblots likely represents another isoform.

(E) qPCR of wild-type, heterozygous, and homozygous KOLF2.1 iPSCs, NPCs, and motor neurons and markers for each stage. CHIR, CHIR99021; EB, embryoid body; LDN, LDN193189; MN, motor neuron; NPC, neural precursor cell; NTFs, neurotrophic factors; RA, retinoic acid; SA, smoothed agonist; SB, SB431542. See also [Figures S1](#) and [S2](#).

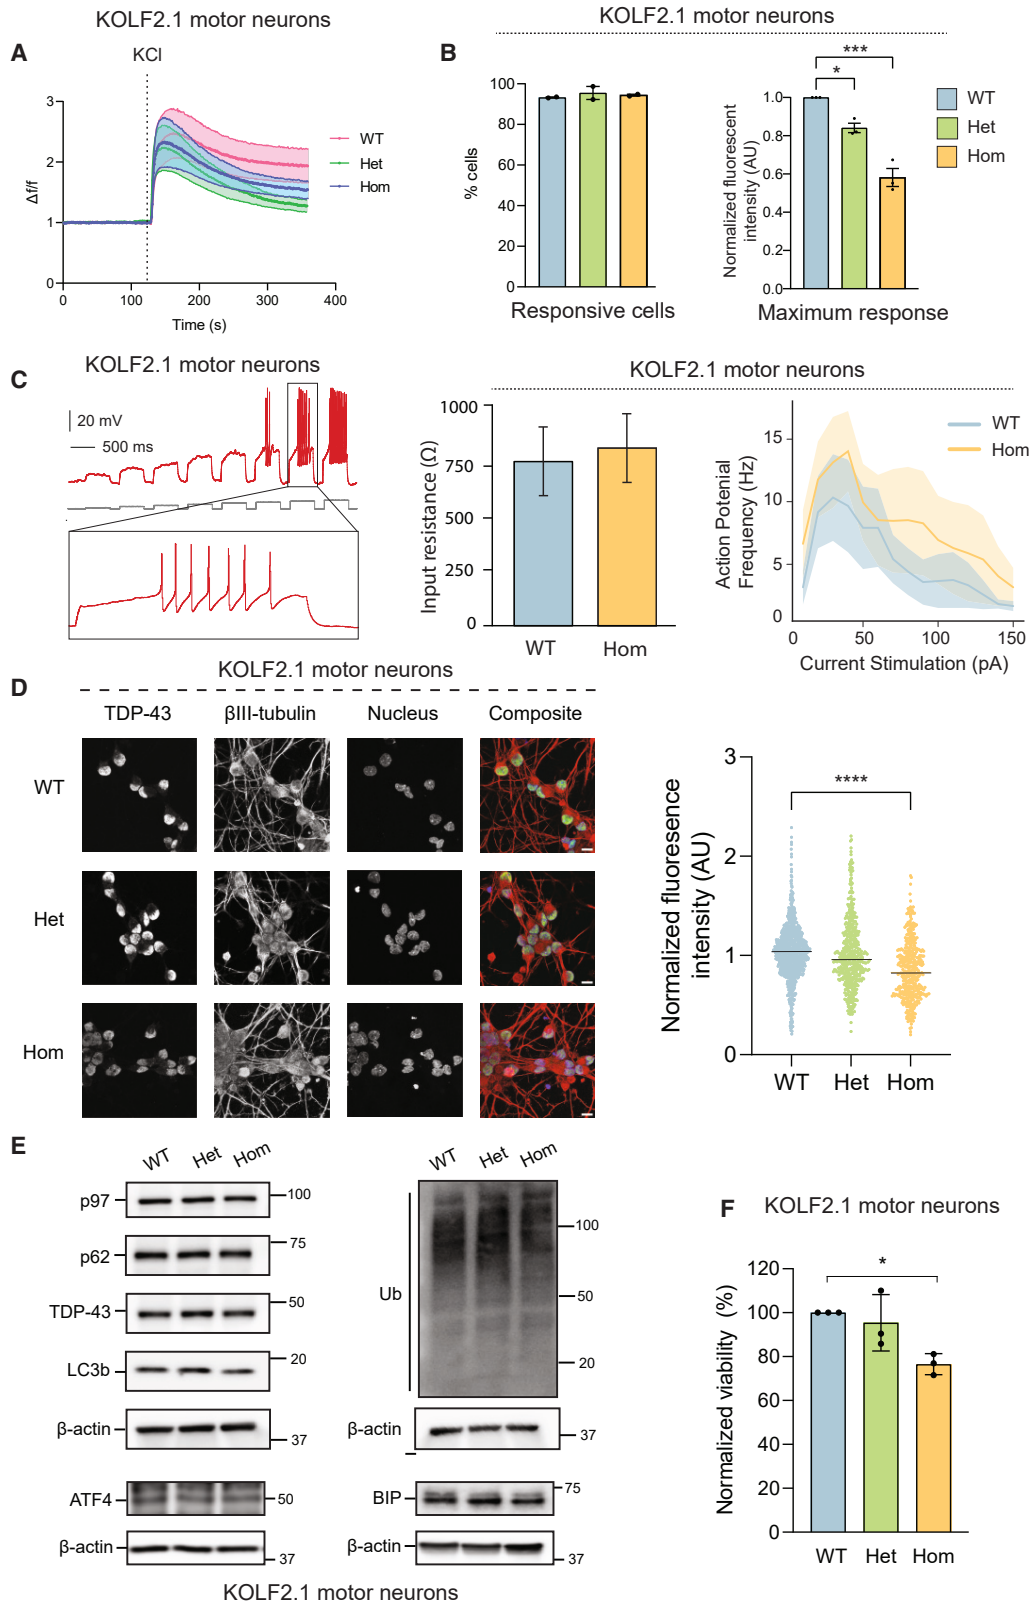

(legend on next page)



cells (NPCs) (Figures 1D, 1E, S1D, S2E, and S2F). NPCs were further patterned using RA and SAG to a ventral, caudal fate for 3 days to create motor neuron progenitors (Figure 1C). Progenitors were replated onto poly L-ornithine (PLO), laminin, and fibronectin-coated plates and cultured in motor neuron maturation media containing neurotrophic factors (neurotrophin-3 [NT-3], brain-derived neurotrophic factor [BDNF], and glial-derived neurotrophic factor [GDNF]), RA, SAG, and the gamma-secretase inhibitor, compound E to activate the notch pathway. Twenty-one days of maturation produced >90% class III  $\beta$ -tubulin (TUJ1), neurofilament heavy chain (SMI32), choline acetyltransferase (CHAT)-positive motor neurons (Figures 1D, 1E, S1E, and S2G).

### Characterization of cellular phenotypes in *p97* R155H motor neurons

We next characterized cellular phenotypes attributed to mutant *p97*. We confirmed that mature KOLF2.1 motor neurons were functional using Fluo-4 a.m. live-cell calcium imaging, which showed >90% of cells responded to 80 mM KCl depolarization (Figures 2A and 2B). Interestingly, KOLF2.1 heterozygous and homozygous motor neurons had lower maximal calcium transients in response to KCl, suggesting altered calcium dynamics (Figure 2B, right). We next performed whole-cell patch clamp in wild-type and homozygous KOLF2.1 motor neurons at day 20. Both genotypes had equivalent input resistance (a measure of neuronal polarization) and had spontaneous action potentials (APs) and trains of action potentials in response to depolarizing current (Figure 2C, left and middle); however, homozygous motor neurons trended toward increased AP frequency though this did not reach statistical significance (Figure 2C right). These data suggest that our differentiation process produces functional motor neurons and that *p97* mutation impacts their electrical activity as reported by others (Hall et al., 2017; Wang et al., 2022).

TAR DNA binding protein 43 (TDP-43) is a nuclear RNA binding protein that regulates the splicing of hundreds of genes (Tollervey et al., 2011) and its mislocalization to the cytosol and aggregation is prominent feature in ALS and MSP-1 (Neumann et al., 2007). We investigated TDP-43 localization in our iPSC lines using confocal microscopy and found that both mutant 392.1 and KOLF2.1 motor neurons had depleted levels of TDP-43 in the nucleus compared with wild-type (Figures 2D and S3A). However, total TDP-43 levels were equivalent between lines suggesting that nuclear depletion was not due to loss of protein (Figures 2E and S3B).

A key cellular function of *p97* is ER-associated degradation (ERAD), which is the retrotranslocation of misfolded, proteins from the ER for proteasomal degradation. Whether *p97* mutation negatively impacts ERAD is debated (Hall et al., 2017; Wang et al., 2022). In our models, we found no change in several markers of ER stress including the transcription factor ATF4 or the ER chaperone BIP (Figures 2E and S3B). Furthermore, we found no significant change in total ubiquitin conjugates or autophagy markers p62 or LC3B (Figures 2E and S3B). We measured cell viability and found that KOLF2.1 and 392.1 *p97* R155H motor neurons had decreased survival relative to wild type in agreement with previous studies (Hall et al., 2017; Wang et al., 2022) (Figures 2F and S3C).

### Unbiased quantitative proteomics reveals distinct proteome alterations between KOLF2.1 and patient cell lines

To interrogate changes in motor neurons due to *p97* mutations at the proteome level, we employed unbiased quantitative proteomics using tandem mass tags (TMTs) (Thompson et al., 2003). Peptides from day 30 motor neurons from wild-type and *p97* R155H (KOLF2.1 or 392.1) were labeled with TMTs and analyzed by liquid chromatography and mass spectrometry (LC/MS-MS) (Figure 3A and Table S1)

### Figure 2. *p97* R155H motor neurons recapitulate ALS phenotypes

- (A) Representative average Fluo-4 fluorescence values from KOLF2.1 motor neurons after 80 mM KCl stimulation (dotted line). The shaded area represents the 95% confidence interval. N = >50 cells per condition.
- (B) Percent of KOLF2.1 motor neurons responsive to KCl stimulation (left). Maximal normalized Fluo-4 fluorescence in motor neurons. N > 150 cells, three independent experiments per condition.
- (C) Sample trace from a wild-type (WT) KOLF2.1 motor neuron in response to a series of depolarizing current steps via whole-cell patch clamp (left). Input resistance from WT and homozygous motor neurons (middle). Input-output curves of motor neurons in WT and homozygous motor neurons at day 20 (right).
- (D) Representative images of TDP-43 immunofluorescence in KOLF2.1 motor neurons (left panels). Quantification of nuclear TDP-43 fluorescence (right). N = >5,000 cells, four independent experiments. Data points represent individual cells; lines represent means. Scale bar, 10  $\mu$ m.
- (E) Representative immunoblots of TDP-43, autophagy markers (p62, LC3b), ER stress markers (ATF4, BIP), and total ubiquitylated proteins (Ub) in KOLF2.1 motor neurons. N = 3 independent experiments.
- (F) Normalized viability of KOLF2.1 motor neurons at day 30. All data expressed as means  $\pm$  SEM unless otherwise indicated. \* $p$  < 0.05, \*\* $p$  < 0.01, \*\*\* $p$  < 0.001, \*\*\*\* $p$  < 0.0001. One-way ANOVA with Dunnett's multiple comparison test (B, D, F). See also Figure S3.

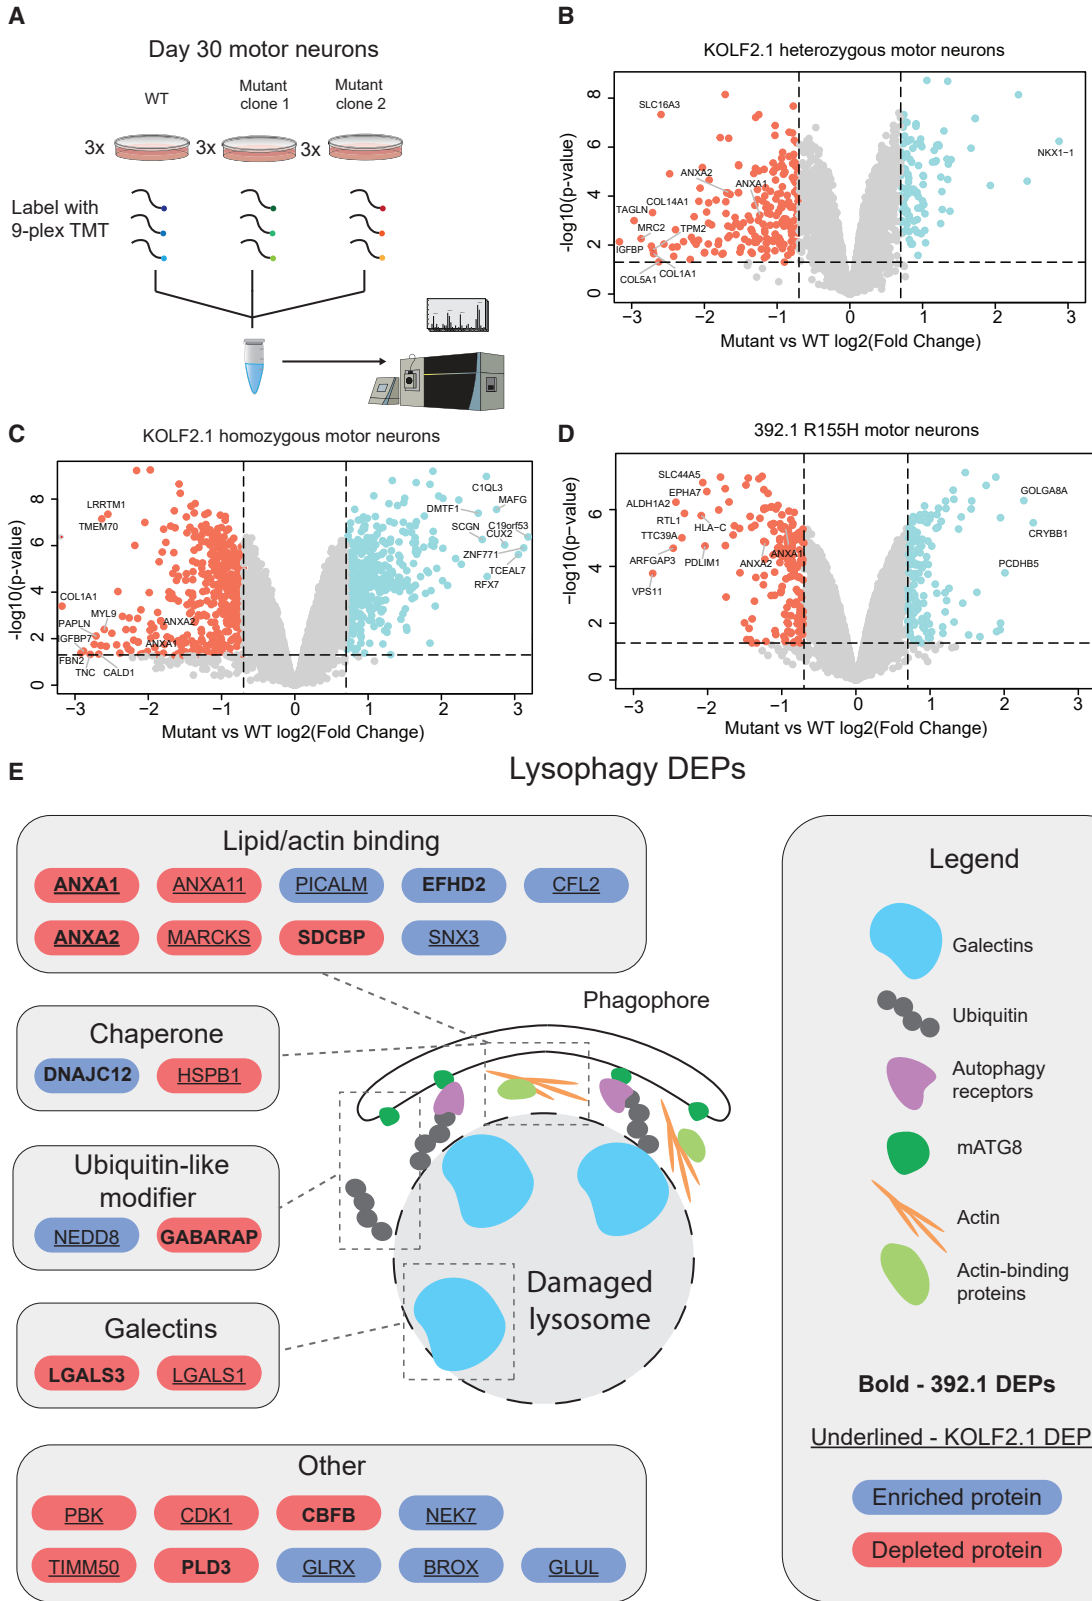

(legend on next page)

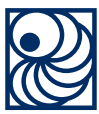

(McAlister et al., 2014; Ting et al., 2011). More than 200 proteins were significantly altered ( $\log_2$  fold change mutant: wild type > 0.7) between mutants and wild-type in both cell lines suggesting broad changes at the protein level despite relatively mild phenotypic alterations (Figures 3B–3D). Gene ontology (GO) analysis of differentially expressed proteins (DEPs) found different pathways altered in KOLF2.1 and 392.1 mutant motor neurons despite the same R155H mutation (Figures S4A–S4C). KOLF2.1 homozygous motor neurons showed significant depletion of mitochondrial proteins (Figure S4B) that are part of complexes regulating import of proteins into mitochondria, and subunits of electron transport chain complexes I–IV was observed (Figure S4D). These results were further validated by immunoblot (Figure S4E). Notably, KOLF2.1 mutant motor neurons had significantly decreased mitochondrial membrane potential as measured using MitoTracker red (Figures S4F and S4G). No significant changes were observed in mitochondrial morphology (Figure S4H). Interestingly, these mitochondrial changes were not seen in the 392.1 mutant motor neurons (Figure S4C, and data not shown). Therefore, we sought to identify altered pathways that were shared between KOLF2.1 and 392.1 motor neurons. We utilized weighted gene correlation network analysis (WGCNA) adapted for proteomic studies to segment proteins into modules with similar expression profiles in an unbiased manner (Wu et al., 2020). This methodology uses a dynamic branch-cutting algorithm to separate clusters identified via a topological overlap matrix into distinct modules (Figure S5A and Table S2). Inspection of module eigenprotein expression revealed agreement between KOLF2.1 and 392.1 wild-type lines, but a divergence in the mutant neurons (Figure S5B). To identify modules that represented proteins changing in a similar manner between cell lines, modules were ranked by a composite score based on concordance between genetic backgrounds and average  $\log_2$  fold change (Figures S5D–S5F and Table S2). The member proteins of the top three ranked modules were used for GO analysis to identify enriched terms. Multiple GO terms related to autophagy and lysosomal homeostasis were enriched (Figures S5D and S5E middle panels).

The identification of several pathways relating to lysosomal homeostasis was particularly interesting as p97 plays

a critical role in the turnover of lysosomes and depletion of p97 leads to the persistence of damaged lysosomes (Papa-dopoulos et al., 2017). We compared our proteomics dataset to two published studies that identified proteins enriched on damaged lysosomes (Eapen et al., 2021) or were ubiquitylated following lysosomal damage (Kravić et al., 2022). We found over 20 DEPs that were differentially modulated in KOLF2.1 and/or 392.1 motor neurons suggesting that p97 R155H hinders the ability of motor neurons to respond to damaged lysosomes (Figure 3E).

### Damaged lysosomes in motor neurons preferentially recruit LGALS8

The alterations in autophagy and endocytosis pathways prompted us to investigate lysosomal turnover in p97 mutant motor neurons. L-leucine leucyl-*O*-methyl ester (LLOME) is a lysomotropic agent that permeabilizes lysosomal membranes to initiate galectin 3 (LGALS3) and autophagy component (p62 and LC3B) recruitment for lysosomal turnover (Eapen et al., 2021; Jia et al., 2020). Galectin recruitment to lysosomes is recognized as a sensitive measure of lysosomal damage (Aits et al., 2015); however, to our knowledge, lysophagy and markers of damaged lysosomes have not been evaluated in human spinal motor neurons. Indeed, other galectins such as LGALS1, LGALS8, and LGALS9 have also been shown to associate with lysosomes following LLOME treatment (Du Rietz et al., 2020). We evaluated the recruitment of LGALS 1, 3, 8, and 9 following LLOME treatment in both NPCs and d30 motor neurons. Surprisingly, we found that while NPCs recruited both LGALS3 and 8 to damaged lysosomes (Figure 4A), motor neurons selectively recruited LGALS8 (Figure 4B). This is in agreement with single-cell expression data of spinal cord cell types (Russ et al., 2021) that indicated that LGALS8 has highest expression in motor neurons compared with other galectins. We note that in addition to punctate localization, LGALS8 immunostaining also showed a non-punctate linear pattern both in untreated and treated conditions (Figure 4B). To ensure that LGALS8 puncta were damaged lysosomes, we performed Airyscan super resolution microscopy on motor neurons stained for the lysosomal protein LAMP1 and LGALS8 after LLOME treatment. All LGALS8 puncta colocalized with LAMP1 while the linear “dashes” did not (Figure 4B right panels). We found that 500  $\mu$ M

### Figure 3. Quantitative proteomics identifies autophagy defects in p97 R155H motor neurons

(A) Schematic of the experimental setup for the KOLF2.1 cells. Three replicates each of wild type (WT) and two clones of heterozygous or homozygous p97 R155H motor neurons were used in two 9-plex TMT experiments. Three replicates of WT and p97 R155H 392.1 motor neurons were used for a 6-plex TMT experiment.

(B–D) Volcano plots for the indicated cell line. Cutoff values of 0.7  $\log_2$  fold change and 0.05 p value were used to determine differentially expressed proteins (DEPs).

(E) Lysophagy-related proteins that were significantly altered in R155H motor neurons. Red and blue backgrounds indicate depleted and enriched proteins, respectively. See also Figures S4 and S5.

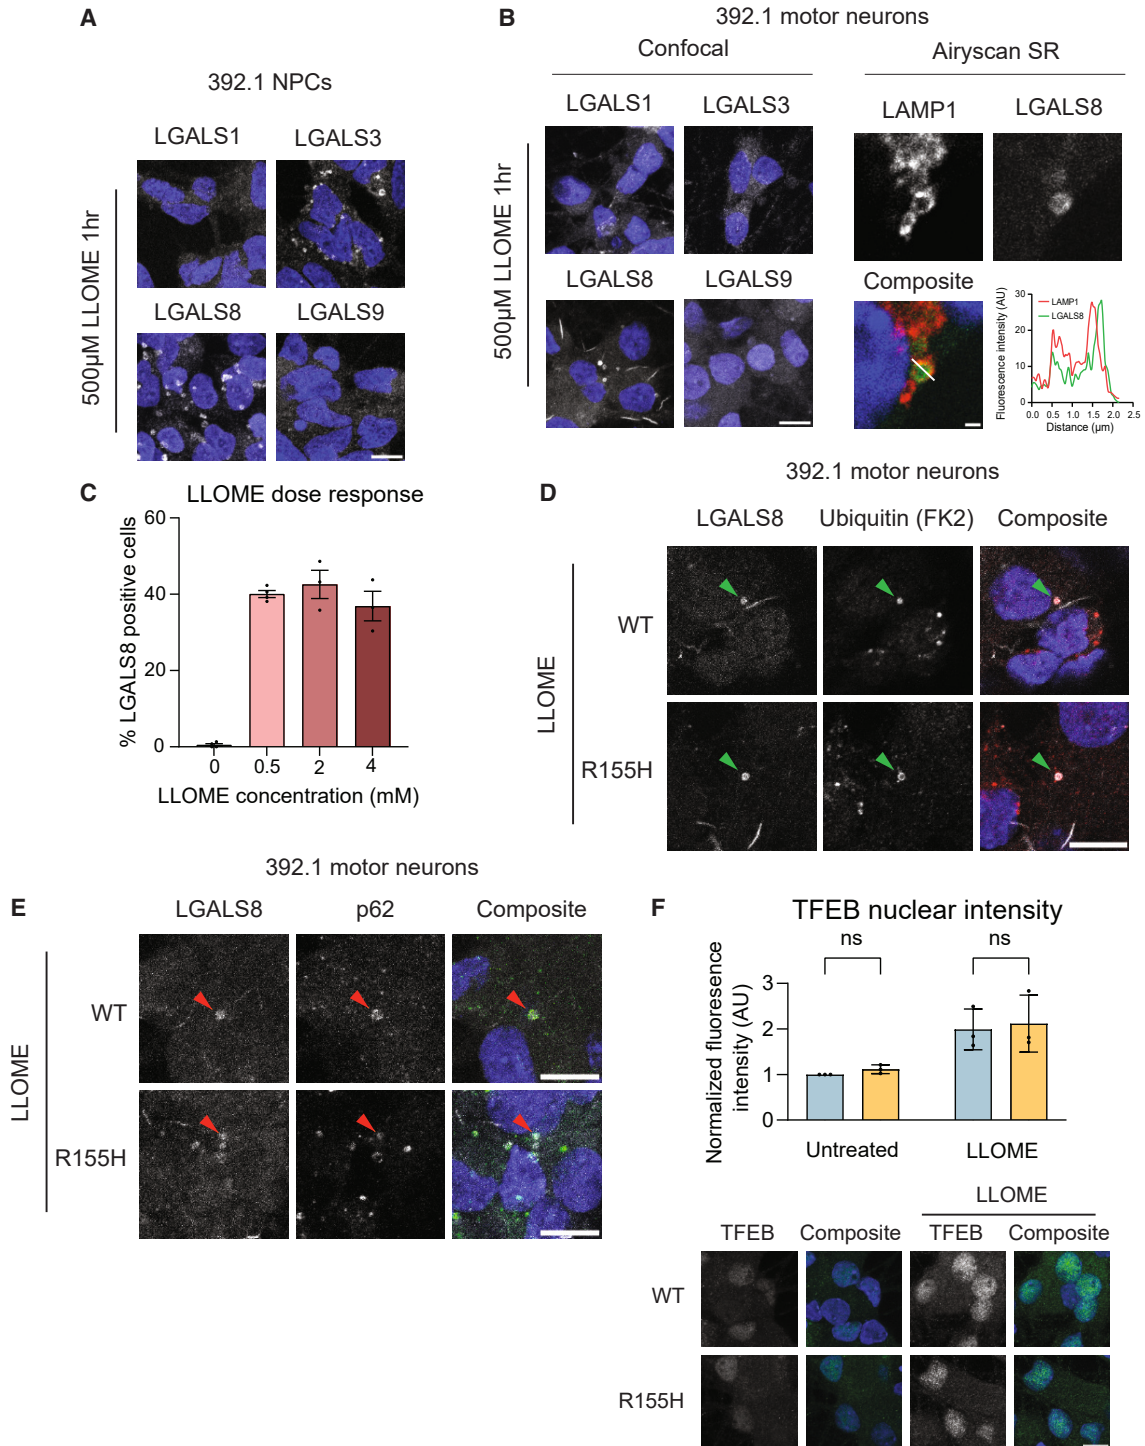

**Figure 4. Motor neurons preferentially recruit LGALS8 to ubiquitylated lysosomes**

(A) Representative images of galectin immunofluorescence in NPCs following 1 h of 500- $\mu$ M LLOME treatment. N = 2 independent experiments. Scale bar, 10  $\mu$ m.

(B) Representative images of galectin immunofluorescence in motor neurons following 1 h of 500- $\mu$ M LLOME (left). Airyscan images of motor neurons following LLOME treatment co-stained with LAMP1 and LGALS8 show colocalization (right). N = 2 independent experiments. Scale bars, 10  $\mu$ m (left) and 1  $\mu$ m (right).

(legend continued on next page)





LLOME was sufficient to induce LGALS8 puncta formation in approximately 40% of cells and this did not increase with increasing dose (Figure 4C). LGALS8 puncta also colocalized with ubiquitin and p62, demonstrating that LGALS8 faithfully represents damaged lysosomes (Figures 4D and 4E). Non-punctate LGALS8 structures were not quantified in our subsequent studies. Previous studies have shown that the transcription factor TFEB translocates from lysosomes to the nucleus to induce lysosome biogenesis upon LLOME treatment (Fujita et al., 2013). We observed equivalent levels of increased nuclear TFEB in both wild-type and mutant motor neurons following LLOME treatment (Figure 4F).

### **p97 R155H disrupts lysophagy in motor neurons**

We utilized LGALS8 puncta formation as a measure of lysosomal damage in the following studies. We asked whether mutant motor neurons had defects in lysophagy. Motor neurons were treated with LLOME and then allowed to recover for 5 or 24 h and lysosome repair was monitored by LGALS8 recruitment (Figure 5A). Wild-type and mutant motor neurons had an equal number of LGALS8 puncta following treatment; however, after 5 h of recovery, wild-type neurons had completely cleared damaged lysosomes while the mutants had LGALS8 puncta that persisted 24 h after treatment (Figures 5B, 5E left, and 5F left). Notably, LGALS8-positive puncta were larger in mutant motor neurons during treatment and after release (Figure 5C). p62/SQSTM1 is a known autophagy receptor that is recruited to damaged lysosomes via interaction with ubiquitylated cargo (Fujita et al., 2013). Immunofluorescence for p62 demonstrated equal recruitment 5 h after treatment between wild-type and mutant; however, mutant motor neurons had significantly increased p62 puncta 24 h after treatment (Figures 5D, 5E right, and 5F right). Failure to clear damaged lysosomes can lead to cell death (Boya and Kroemer, 2008). We assessed viability following LLOME treatment and found that mutant motor neurons had increased cell death following release while wild-type neurons had no change (Figures 6A and S6A). We next asked whether disrupted levels of proteins involved in lysosome repair may also impact lysosome function in resting cells. We interrogated lysosomal pH using the pH-sensitive dye LysoSensor DND-189, which accumulates in acidic compartments and fluoresces at low pH. Following subthreshold LLOME or bafilomycin-A1 (inhib-

itor of lysosomal vacuolar H<sup>+</sup> ATPase) treatment, we found that the LysoSensor fluorescence was significantly decreased demonstrating compromised pH (Figures 6B and S6B). Notably, mutant motor neurons had decreased fluorescence at basal levels compared with wild-type (Figures 6B and S6B).

Ubiquitylation of lysosomal proteins is a key step in lysophagy and is required for lysosomal clearance (Chauhan et al., 2016). To determine if damaged lysosomes in mutant neurons were ubiquitylated, we co-stained for LGALS8 and ubiquitin. We found that LGALS8 puncta colocalized with ubiquitin in both wild-type and mutant motor neurons (Figures S6C and S6D). We next asked if mutant p97 was recruited to damaged lysosomes. However, both wild-type and mutant p97 were equally recruited to ubiquitylated lysosomes (Figures 6C and 6D). Mutations in p97 have been reported to alter the association with the adaptor UBXD1, a component of the ELDR complex (Ritz et al., 2011). We immunoprecipitated endogenous p97 from wild-type and mutant motor neurons before, during, and after LLOME treatment. At basal levels, both wild-type and mutant p97 associated with UBXD1; however, during LLOME treatment, wild-type p97 increased association with UBXD1 while mutant p97 did not (Figure 6E, compare lanes 10 with 11 and 12 with 13 and S6E, compare lane 13 with 14 and 15). Our studies suggest that p97 R155H motor neurons have perturbed lysosomal function and are unable to restore lysosomal homeostasis.

### **Inhibition of p97 rescues lysophagy defects in mutant motor neurons**

p97 R155H has increased ATPase activity *in vitro*, and multiple studies have used p97 inhibitors to rescue disease phenotypes including in iPSC-derived motor neurons (Harley et al., 2021; Wang et al., 2022). However, it is unknown if p97 inhibition rescues defective lysophagy. We attempted to prevent the persistence of damaged lysosomes in mutant motor neurons using a low dose of CB-5083, a highly specific p97 ATP-competitive inhibitor (Zhou et al., 2015) (Figure 7A). p97 inhibition by itself did not cause LGALS8 or p62 puncta formation in CB-5083-treated cells (Figures 7B, S7A, and S7E). Notably, CB-5083 treatment caused mutant neurons to accelerate the clearance of damaged lysosomes in a manner that was comparable to wild-type neurons (Figures 7B, 7C, and S7A). Indeed, 24 h following LLOME treatment, mutant neurons were

(C) Percent cells with LGALS8 puncta after 1 h of LLOME at indicated doses. N = 3 independent experiments.

(D and E) Representative images of LLOME-treated motor neurons co-stained for LGALS8 and ubiquitin (D) or p62 (E) demonstrating colocalization. N = 3 independent experiments. Scale bar, 10  $\mu$ m.

(F) Representative images of TFEB staining. Quantification of nuclear TFEB fluorescence intensity. Scale bar, 10  $\mu$ m. N = 3 independent experiments. All data expressed as means  $\pm$  SEM. ns = nonsignificant. One-way ANOVA with Dunnett's multiple comparison test (C, F). See also Figure S6.

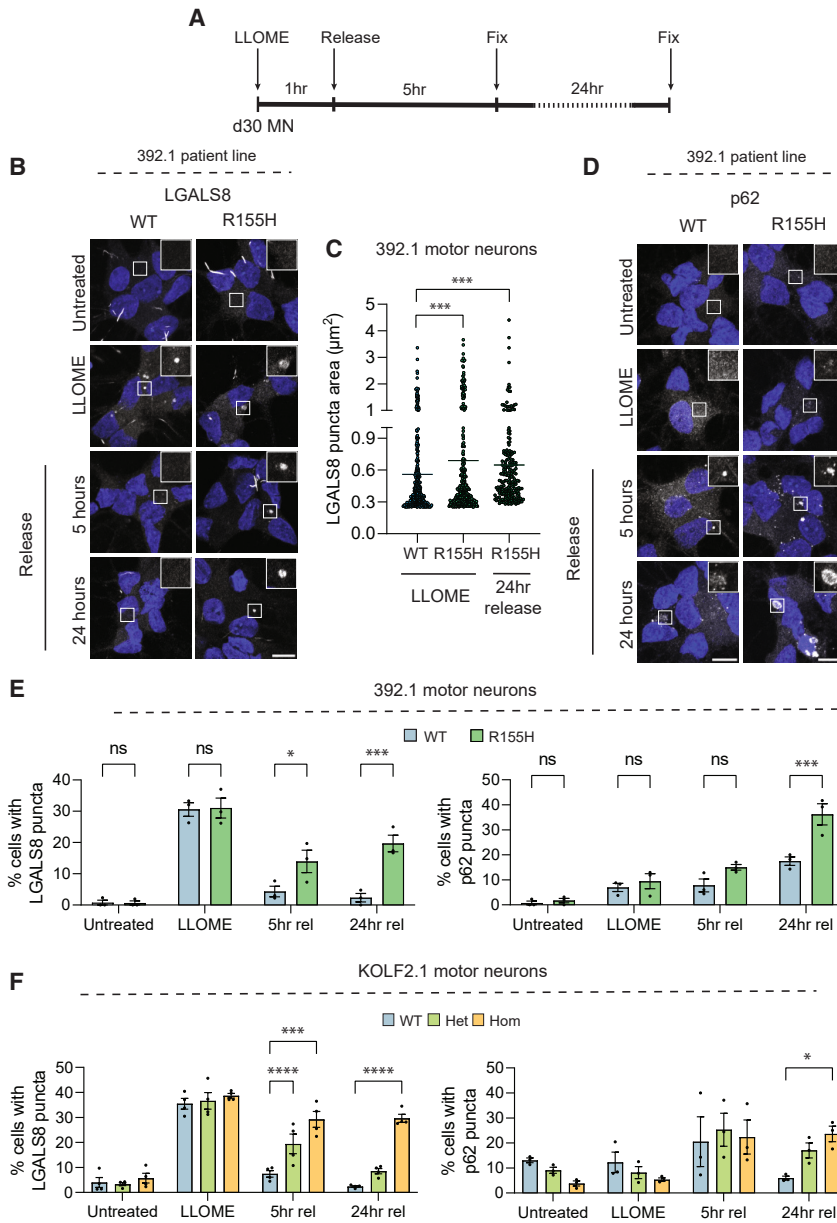

**Figure 5. *p97* R155H motor neurons are unable to clear damaged lysosomes and accumulate p62 following LLOME treatment**

(A) Schematic of experimental design. Day 30 motor neurons were fixed either before LLOME treatment, directly after treatment, or 5 and 24 h after release.

(B) Representative images of 392.1 motor neurons stained for LGALS8 before, during, and after LLOME treatment. Scale bar, 10  $\mu\text{m}$ .

(C) LGALS8 puncta size in wild-type and R155H 392.1 motor neurons following LLOME treatment and release. Data expressed as individual LGALS8 puncta; lines represent means.

(D) Representative images of 392.1 motor neurons stained for p62. Scale bar, 10  $\mu\text{m}$ .

(E) Quantification of (B) (left) and (C) (right) in 392.1 motor neurons. N = 3 independent experiments.

(F) Quantification of LGALS8 puncta (left) and p62 puncta (right) in KOLF2.1 motor neurons. N = 3 independent experiments. D30 MN – day 30 motor neurons. 5h rel – 5-h release, 24h rel – 24-h release. Data expressed as means  $\pm$  SEM unless otherwise indicated. ns = nonsignificant, \* $p < 0.05$ , \*\* $p < 0.01$ , \*\*\* $p < 0.001$ , \*\*\*\* $p < 0.0001$ . One-way ANOVA with Sidak's multiple comparison test (B). Two-way ANOVA with Sidak's (E) or Dunnett's (F) multiple comparison test. See also Figure S6.

indistinguishable from wild-type (Figure 7C). LGALS8 puncta in mutant motor neurons were larger than those in wild-type during CB-5083 treatment, similar to the pattern seen in non-CB-5083-treated neurons (Figure S7B). Previous studies have shown that p97 inhibition can stall lysophagy, which we did not observe at the low 1- $\mu\text{M}$  dose. We asked whether higher doses of CB-5083 were also able to rescue lysophagy defects; however, at 2- $\mu\text{M}$  and 4- $\mu\text{M}$  CB-5083, we found that CB-5083 was unable to rescue the phenotype and LGALS8 puncta persisted in both wild-type and mutant motor neurons up to 24 h (Figure S7C). Doses higher than 4  $\mu\text{M}$  caused significant cell death (data not shown).

While wild-type neurons treated with CB-5083 were able to clear LGALS8 puncta at a similar rate to untreated neurons, they showed persistent and elevated levels of p62 puncta 24 h after LLOME (Figures S7D–S7F). Indeed, increased p62 puncta were observed upon LLOME-CB-5053 co-treatment compared with LLOME alone (Figure S7F). This may be a consequence of general perturbations in autophagy due to p97 inhibition. We next asked if p97 inhibition could rescue lysosomal pH in mutant motor neurons. CB-5083 treatment restored basal lysosomal pH in mutant motor neurons to that of wild-type neurons (Figures 7D, 7E, and S7G). Furthermore, CB-5083 treatment prevented cell death in *p97* mutant motor neurons

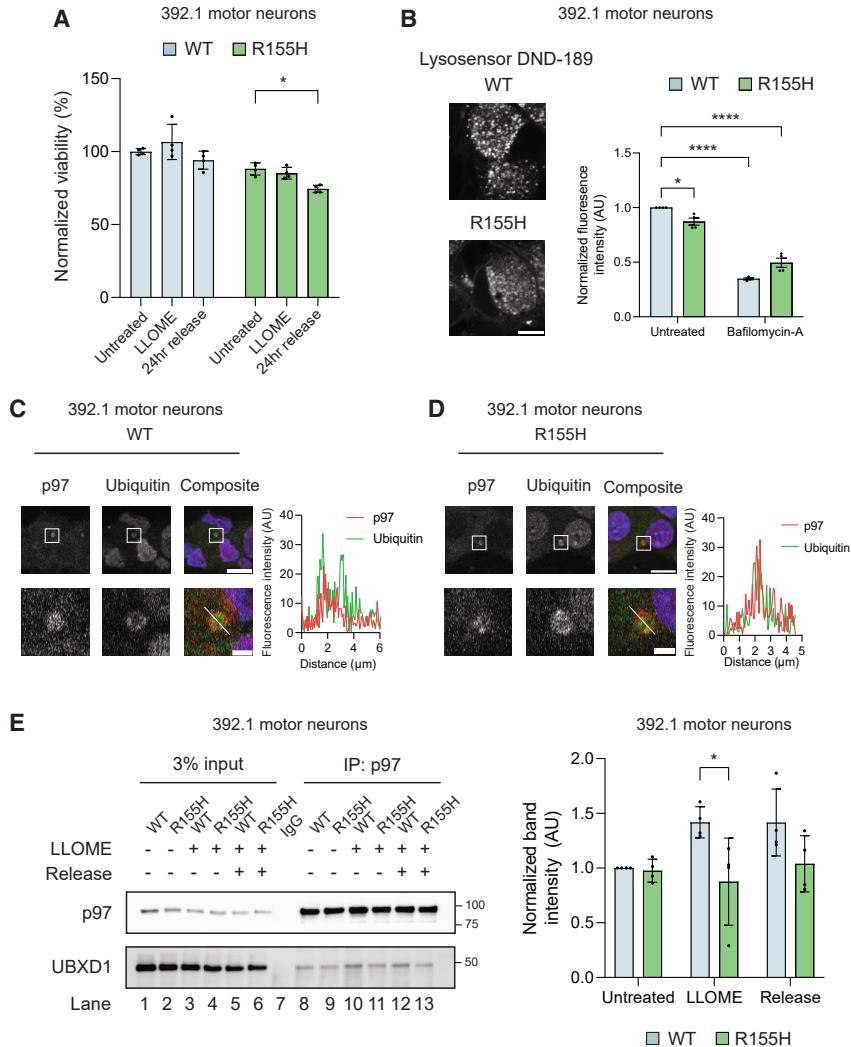

**Figure 6. p97 R155H sensitizes motor neurons to lysosomal damage, decreases lysosomal acidity, and disrupts UBXD1 recruitment**

(A) Normalized viability in 392.1 motor neurons in untreated, LLOME treated, or after release. N = 4 independent experiments.

(B) Representative images of LysoSensor DND-189 live-cell imaging in 392.1 motor neurons (left). Quantification of DND-189 fluorescence in untreated and bafilomycin-A treated cells. N = 4 independent experiments. Scale bar, 5  $\mu$ m.

(C and D) Representative images of wild-type (C) and p97 R155H (D) 392.1 motor neurons co-stained with p97 and ubiquitin showing colocalization (left). Line graph of the fluorescence intensity of p97 and ubiquitin as indicated in the bottom right image panel. N = 3 independent experiments. Scale bars, 10  $\mu$ m (upper panels) and 1  $\mu$ m (lower panels).

(E) Immunoblot of endogenous p97 immunoprecipitation in 392.1 motor neurons before, during, and after LLOME treatment (left). Release condition represents 5 h of recovery. Quantification of UBXD1 band intensities normalized to immunoprecipitated p97 (left). Data expressed as normalized band intensities  $\pm$ SD. N = 4 independent experiments. All data expressed as means  $\pm$  SEM unless otherwise indicated. \*p < 0.05, \*\*p < 0.01, \*\*\*p < 0.001, \*\*\*\*p < 0.0001. Two-way ANOVA with Dunnett's (A) or Sidak's (B, E) multiple comparison test. See also Figure S6.

during release from LLOME (Figures 7F and S7H). Thus, we conclude that p97 inhibition partially rescues defective lysophagy.

## DISCUSSION

p97 mutations cause MSP-1 in humans, which is a heterogeneous disease involving bone, muscle, spinal cord, and brain. Disease onset and symptom progression is highly variable even between members of the same family, possibly due to unknown risk alleles that modulate disease pathogenesis (Al-Obeidi et al., 2018). Due to this heterogeneity, inferring pathways altered by p97 mutations has been challenging. Previous iPSC-derived motor neuron models of p97 disease have been discordant, with some indicating ER stress and mitochondrial dysfunction (Hall et al., 2017) while others attribute disease to aberrant cell-

cycle protein expression (Wang et al., 2022). Similar to previous studies, we found that p97 R155H altered different pathways in different genetic backgrounds. While the KOLF2.1 cell line with p97 R155H displayed mitochondrial deficits (Figures S4B and S4D), the 392.1 patient cell line had no significant alterations to the mitochondrial proteome (Figure S4C).

Unbiased clustering of proteins via WGCNA found that proteins relating to autophagy and endocytosis were altered (Figure 3H). Autophagy has been intensely investigated in ALS as multiple ALS-linked mutations are found in autophagy-related proteins (Chua et al., 2022). One of these proteins, p62 (SQSTM1), causes multisystem proteinopathy 2 (MSP-2), suggesting that autophagy defects are a common feature in MSPs. Mutations in p97 and inhibition of p97 disrupt autophagy in cells (Gonzalez et al., 2014; Hill et al., 2021) and animals (Ching and Weihl, 2013; Ju et al., 2009); however, only recently has this disruption been

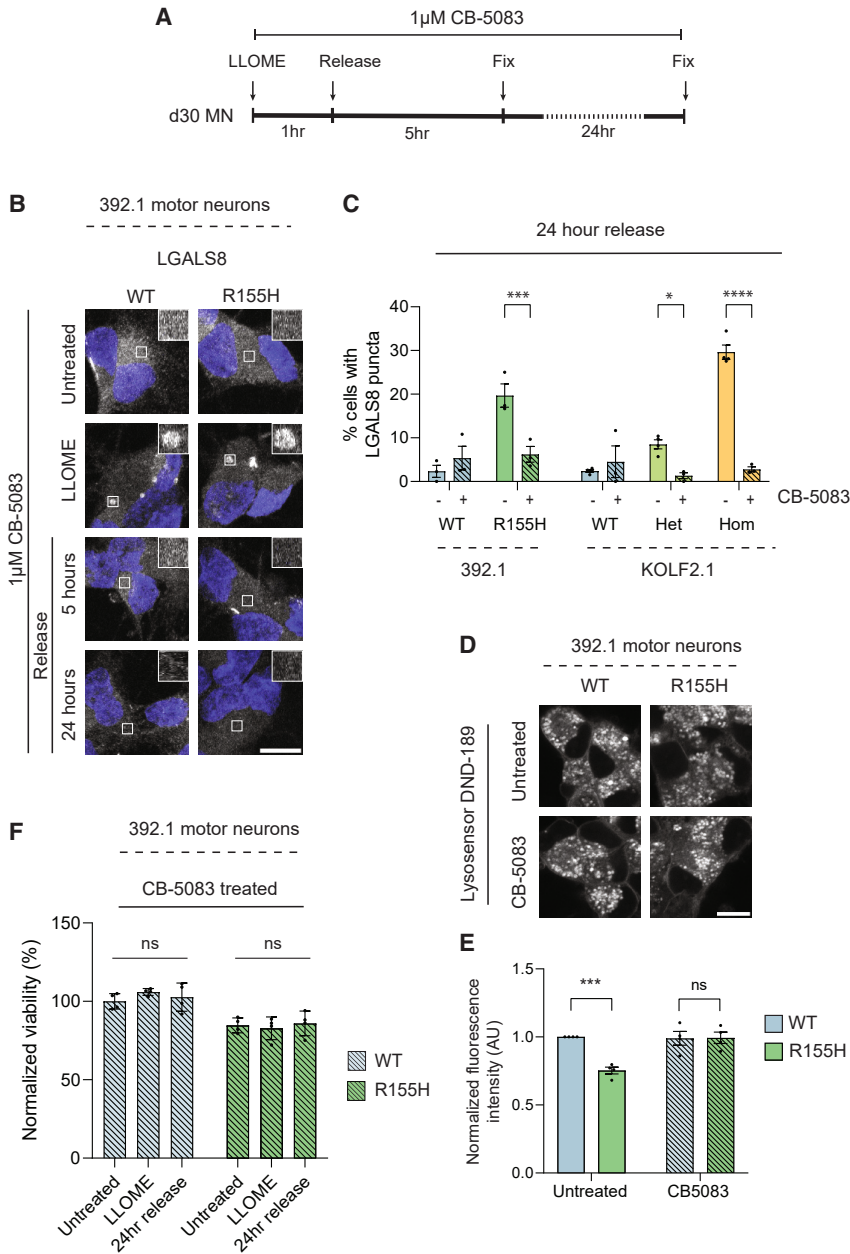

### Figure 7. p97 inhibition rescues persistence of damaged lysosomes

(A) Schematic of experimental design.

(B) Representative images LGALS8 puncta in 392.1 motor neurons in untreated, LLOME treated, or after release. All conditions contain CB-5083. Scale bar, 10  $\mu$ m.

(C) Quantification of LGALS8 puncta in 392.1 and KOLF2.1 motor neurons 24 h after LLOME treatment with and without CB-5083 co-treatment. N = 3 independent experiments.

(D) Representative images of LysoSensor DND-189 live-cell imaging in untreated and CB-5083-treated 392.1 motor neurons.

(E) Quantification of DND-189 fluorescence in untreated (solid bars) and CB-5083 treated (shaded bars) motor neurons. N = 4 independent experiments. Scale bar, 10  $\mu$ m.

(F) Quantification of 392.1 motor neuron viability before, during, and after LLOME and CB-5083 co-treatment. N = 4 independent experiments. All data expressed as means  $\pm$  SEM unless otherwise indicated. \*p < 0.05, \*\*p < 0.01, \*\*\*p < 0.001, \*\*\*\*p < 0.0001.

Two-way ANOVA with Sidak's (C, D) or Dunnett's (F) multiple comparison test. See also Figure S7.

linked to defects in lysophagy (Ferrari et al., 2022; Papadopoulos et al., 2017). Multiple components of lysosome repair machinery were common between genetic backgrounds, including annexins (ANXA1, 2, and 11), which were depleted in mutant motor neurons (Figure 3E). Annexins are calcium-dependent phospholipid binding proteins whose depletion delayed lysosome repair independent of ESCRT machinery (Rescher and Gerke, 2004; Yim et al., 2022). Mutations in *ANXA11* cause ALS (Smith et al., 2017) and a yet unnamed subtype of MSP (Leoni et al., 2021). *ANXA11* contains a low complexity domain that associates with RNA and tethers RNA granules to lyso-

somes for transport, which is thought to be disrupted by disease-linked mutations (Liao et al., 2019). While *ANXA2* does not have a low complexity domain, it is known to bind mRNA (Filipenko et al., 2004) but whether it plays a similar role to *ANXA11* remains to be determined.

Here, we show that motor neurons specifically recruit LGALS8 to damaged lysosomes after LLOME treatment while other galectins including LGALS3 remain diffuse (Figure 4B). LGALS8 has a unique role in regulating mTOR inactivation and has been suggested to promote lysophagy over membrane repair compared with other galectins (Jia et al., 2018). Our finding that motor neurons

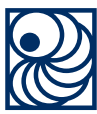

preferentially recruit LGALS8 may indicate that lysophagy dominates membrane repair when faced with lysosomal damage; however, further study of lysosome repair and turnover in motor neurons is required. Galectin accumulation has been noted in skeletal muscle tissue from patients with *p97* mutations (Papadopoulos et al., 2017) and spinal cord tissue from patients with sporadic ALS (Kato et al., 2001). Indeed, changes in galectin levels in cerebrospinal fluid and blood have been proposed as potential biomarkers for ALS disease progression (Ashraf and Baeesa, 2018; Zhou et al., 2010).

The cellular response to lysosome damage is increasingly recognized as an important homeostatic pathway that, when disrupted, may lead to disease (Yang and Tan, 2023; Zoncu and Perera, 2022). Proper lysosome turnover requires a multi-step process that includes *p97*-mediated extraction of ubiquitylated substrates (Kravić et al., 2022). We found that in motor neurons, mutant *p97* prevents timely clearance of damaged LGALS8-positive lysosomes (Figure 5). While mutant *p97* was recruited to ubiquitylated lysosomes, it did not increase in association with UBXD1 and presumably the ELDR complex (Figures 6 and S6). Without proper ELDR complex assembly, damaged lysosomes are unable to be turned over, leading to persistent damaged lysosomes (Papadopoulos et al., 2017).

*In vitro* studies of *p97* mutations have shown increased ATPase activity leading to the hypothesis that these mutations are gain-of-function (Manno et al., 2010). *In vivo* studies have challenged this notion, as knocking out neuronal *p97* in mice recapitulates MSP-1 phenotypes (Wani et al., 2021). *p97* inhibitors have been used to attempt to rescue mutant *p97*-mediated dysfunction with success (Harley et al., 2021; Wang et al., 2022; Zhang et al., 2017). We found that treatment with low doses of CB-5083 allowed mutant *p97* motor neurons to clear LGALS8 puncta at a similar rate as wild-type motor neurons (Figure 7). Interestingly, previous studies have found that *p97* inhibition has both decreased LGALS3 puncta clearance (Magnaghi et al., 2013; Papadopoulos et al., 2017) and increased autophagic flux (Anderson et al., 2015). We found no lysophagy defect in CB-5083-treated wild-type motor neurons (Figures 7B and 7C). However, at higher doses lysophagy was equally inhibited in both wild-type and mutant motor neurons. Neurons may be able to better tolerate *p97* inhibition than dividing cells such as HeLa or U2OS, which have been primarily used in previous studies. In wild-type and mutant neurons, *p97* inhibition increased p62 accumulation (Figure S7). The divergence of LGALS8 and p62 puncta here suggests there are additional processes at play that require autophagic clearance. p62 is utilized for ubiquitin-mediated autophagy, which includes stress granule clearance and mitophagy: two processes that require *p97* (Buchan et al., 2013; Tanaka et al., 2010; Zaffag-

nini and Martens, 2016). The additional rescue of lysosomal pH and viability suggests that *p97* inhibition may afford therapeutic benefit (Figure 7 and S7).

While we focus here on the R155H mutation, as 90% of individuals with MSP-1 have this mutation, it is likely that other similar mutations in the N-D1 linker region that perturb UBXD1 interaction also impact lysophagy. Further studies with distinct mutations are required to validate this. Our findings add to the increasing evidence that lysosomal homeostasis, particularly lysophagy, are critical components to neuronal health and disruptions in this process lead to disease.

## EXPERIMENTAL PROCEDURES

### Resource availability

#### Corresponding author

Further information and requests for resources and reagents should be directed to and will be fulfilled by the lead contact, Malavika Raman (Malavika.raman@tufts.edu).

#### Material availability

KOLF2.1 cell lines are available through iNDI. Please contact Conrad Wehl for 391.1 patient iPSCs. Please contact the corresponding author for all other reagent requests.

#### Data and code availability

Proteomic data are available via ProteomeXchange with identifier PXD048185. Any other data are available from the corresponding author upon request.

### Induced pluripotent stem cell culture

The KOLF2.1 iPSCs and mutants were acquired from Jackson Laboratories as a part of the iNDI project (Pantazis et al., 2022); 392.1 iPSCs and the CRISPR-corrected line were received from the Wehl laboratory at WUSTL. The patient is a 48-year-old man with a family history of dementia, weakness, and Paget's disease of the bone. He has history of Paget's disease of the bone beginning 1 year prior and presents with subacute onset of slowly progressive right lower extremity and left upper extremity weakness. His EMG/NCS demonstrated active denervation in three body regions including his thoracic paraspinal muscles consistent with a diagnosis of ALS. He developed difficulty with breathing at the age of 52 and currently uses non-invasive ventilation at night. He has no symptoms of dementia currently. He has a heterozygous R155H mutation in *p97*. iPSCs were maintained in mTeSR (05825 STEMCELL) plus media on Matrigel (354277 Corning)-coated plates for no more than 10 passages at 37°C in humidified incubators. iPSCs were passaged using ReLeSR (05873 STEMCELL) once they reached ~80% confluency; 10 μM Rho kinase inhibitor Y-27632 (ROCK inhibitor) was added for 24 h after each split. Cell morphology was routinely monitored for abnormalities. Karyotyping for each cell line was performed by the WiCell Research Institute.

### Neural ectoderm induction and NPC maintenance

We used a modified version of previously published motor neuron protocols (Du et al., 2015; Qu et al., 2014; Shimojo

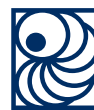

et al., 2015). Once iPSCs reached 80% confluency, the media was replaced with freshly made induction media (Table S1). Cells were kept in induction media with daily media changes for 3 days. Induction media was replaced with induction-patterning media for an additional 3 days with daily media changes to induce PAX6+ NPCs. At this stage, NPCs were passaged by incubating with 0.05% trypsin-EDTA (25300054 Thermo) for 4–8 min at 37°C. NPCs were collected using DMEM (SH30243.01 Cytiva) with 10% FBS (26140079 Gibco) and 1% P/S (PSL01 Caisson) to inactivate trypsin and centrifuged at  $300 \times g$  for 5 min. The media was aspirated, and cells were resuspended in fresh expansion media supplemented with 10  $\mu$ M ROCK inhibitor and plated at 1:4 or  $1.5 \times 10^5$  cells/cm<sup>2</sup> on Matrigel-coated plates. After 24 h, the media was replaced with fresh expansion media without ROCK inhibitor. NPCs were banked at this stage in complete expansion media with 10% DMSO in liquid nitrogen storage. NPCs were thawed, centrifuged at  $300 \times g$  for 5 min, and plated in expansion media supplemented with 10  $\mu$ M ROCK inhibitor. Twenty-four hours later the media was replaced with fresh expansion media without ROCK inhibitor. NPCs were passaged for no more than five passages or 14 days. Further passaging increases spontaneous differentiation and cultures become more heterogeneous.

### Motor neuron differentiation and maturation

NPCs were plated at  $1.5 \times 10^5$ /cm<sup>2</sup> in 12-well plates and allowed to grow for 3 days. After 3 days, expansion media was replaced with patterning media for 3 days with daily media changes. After 3 days, the cells were split as described previously, and resuspended in maturation media supplemented with 10  $\mu$ M ROCK inhibitor. Cells were plated on triple-coated PLO/laminin/fibronectin plates at  $4 \times 10^4$ /cm<sup>2</sup> for biochemistry applications or  $1 \times 10^4$ /cm<sup>2</sup> on acid-washed #1.5 glass coverslips (200121 Azer). Half media change was performed the following day with maturation media supplemented with 10  $\mu$ M ROCK inhibitor. Half the media was replaced 2 days later with maturation media supplemented with 40 mM BrdU to inhibit proliferating cells. Half media changes were performed every 2–3 days for an additional 19 days. Media composition can be found in the [supplementary methods](#).

### Live-cell imaging

Starting on day 9 of differentiation, progenitors were plated on 4-chambered live-cell imaging dishes (D35C4-20-1-N Cellvis) that were triple coated (PLO/laminin/fibronectin). Cells were maintained as previously described. Cells were treated as previously described. Cells were loaded with LysoSensor DND-189 (L7535 Molecular Probes) or Fluo-4 (F14201 Invitrogen) at 1  $\mu$ M for 30 min or MitoTracker red (M22425 Cell Signaling) at 100 nM for 45 min at 37°C. Cells were then washed once with PBS and the media was replaced with imaging media (complete 3M without phenol red). Cells loaded with Fluo-4 were incubated at room temperature for 20 min before imaging. Samples were imaged immediately in a temperature-controlled chamber attached to a Zeiss LSM800 Airyscan confocal microscope. Images were taken at  $\times 20$  (Fluo-4) or  $\times 63$  (LysoSensor and MitoTracker) magnification. Image analysis was performed in ImageJ using custom macro scripts.

### Statistics and reproducibility

For all experiments,  $n \geq 3$  or more biological replicates for each condition examined except immunofluorescence characterization experiments in Figures 4, S1, and S2 ( $n = 2$ ). Fold changes, SEM, SD, and statistical analyses were performed using GraphPad Prism version 9.4.1 for Windows (GraphPad Software). Statistical tests and  $n$  values are mentioned in the figure legends.

### SUPPLEMENTAL INFORMATION

Supplemental information can be found online at <https://doi.org/10.1016/j.stemcr.2024.01.002>.

### ACKNOWLEDGMENTS

We thank members of the Raman lab for critical reading of the manuscript. This work is supported by NIH grants GM127557 and NS123631 and Research Grant 1070479 from the Muscular Dystrophy Association to M.R. M.A.J. is an IRACDA scholar funded by GM133314. This work was funded in part by NIH grant GM67945 (S.P.G.) and GM132129 (J.A.P.), AA026256, NS105628, NS102937, MH128235, and MH122379 (J.M.) and AG031867 and AR073317 (C.C.W.).

### AUTHOR CONTRIBUTIONS

J.K. and M.R. conceived the studies. J.K. performed all studies and data analysis, M.J. performed qRT-PCR and assisted in validation studies. C.P. and J.M. performed electrophysiology and analysis, J.P. and S.P.G. assisted with proteomic studies. C.C.W. generated the patient iPSC line. J.K. and M.R. wrote the manuscript.

### DECLARATION OF INTERESTS

The authors declare no competing interests.

Received: July 11, 2023

Revised: January 5, 2024

Accepted: January 8, 2024

Published: February 8, 2024

### REFERENCES

- Ahlstedt, B.A., Ganji, R., and Raman, M. (2022). The functional importance of VCP to maintaining cellular protein homeostasis. *Biochem. Soc. Trans.* 50, 1457–1469.
- Aits, S., Krickler, J., Liu, B., Ellegaard, A.-M., Hämälistö, S., Tvingsholm, S., Corcelle-Termeau, E., Høgh, S., Farkas, T., Holm Jonassen, A., et al. (2015). Sensitive detection of lysosomal membrane permeabilization by lysosomal galectin puncta assay. *Autophagy* 11, 1408–1424.
- Al-Obeidi, E., Al-Tahan, S., Surampalli, A., Goyal, N., Wang, A.K., Hermann, A., Omizo, M., Smith, C., Mozaffar, T., and Kimonis, V. (2018). Genotype-phenotype study in patients with VCP valosin-containing protein mutations associated with multisystem proteinopathy. *Clin. Genet.* 93, 119–125.
- Anderson, D.J., Le Moigne, R., Djakovic, S., Kumar, B., Rice, J., Wong, S., Wang, J., Yao, B., Valle, E., Kiss von Soly, S., et al. (2015). Targeting the AAA ATPase p97 as an approach to treat



- cancer through disruption of protein homeostasis. *Cancer Cell* 28, 653–665.
- Arhzaouy, K., Papadopoulos, C., Schulze, N., Pittman, S.K., Meyer, H., and Wehl, C.C. (2019). VCP maintains lysosomal homeostasis and TFEB activity in differentiated skeletal muscle. *Autophagy* 15, 1082–1099.
- Ashraf, G.M., and Baesa, S.S. (2018). Investigation of Gal-3 Expression Pattern in Serum and Cerebrospinal Fluid of Patients Suffering From Neurodegenerative Disorders. *Front. Neurosci.* 12, 430.
- Blythe, E.E., Gates, S.N., Deshaies, R.J., and Martin, A. (2019). Multisystem Proteinopathy Mutations in VCP/p97 Increase NPLOC4·UFD1L Binding and Substrate Processing. *Structure* 27, 1820–1829.e4.
- van den Boom, J., and Meyer, H. (2018). VCP/p97-Mediated Unfolding as a Principle in Protein Homeostasis and Signaling. *Mol. Cell* 69, 182–194.
- Boya, P., and Kroemer, G. (2008). Lysosomal membrane permeabilization in cell death. *Oncogene* 27, 6434–6451.
- Buchan, J.R., Kolaitis, R.-M., Taylor, J.P., and Parker, R. (2013). Eukaryotic Stress Granules Are Cleared by Autophagy and Cdc48/VCP Function. *Cell* 153, 1461–1474.
- Buchberger, A., Schindelin, H., and Hänzelmann, P. (2015). Control of p97 function by cofactor binding. *FEBS Lett.* 589, 2578–2589.
- Chauhan, S., Kumar, S., Jain, A., Ponpuak, M., Mudd, M.H., Kimura, T., Choi, S.W., Peters, R., Mandell, M., Bruun, J.-A., et al. (2016). TRIMs and Galectins Globally Cooperate and TRIM16 and Galectin-3 Co-direct Autophagy in Endomembrane Damage Homeostasis. *Dev. Cell* 39, 13–27.
- Ching, J.K., and Wehl, C.C. (2013). Rapamycin-induced autophagy aggravates pathology and weakness in a mouse model of VCP-associated myopathy. *Autophagy* 9, 799–800.
- Chua, J.P., De Calbiac, H., Kabashi, E., and Barmada, S.J. (2022). Autophagy and ALS: mechanistic insights and therapeutic implications. *Autophagy* 18, 254–282.
- Cooney, I., Han, H., Stewart, M.G., Carson, R.H., Hansen, D.T., Iwasa, J.H., Price, J.C., Hill, C.P., and Shen, P.S. (2019). Structure of the Cdc48 segregase in the act of unfolding an authentic substrate. *Science* 365, 502–505.
- Dec, E., Ferguson, D., Nalbandian, A., Gargus, M., Katheria, V., Rana, P., Ibrahim, A., Hatch, M., Lan, M., Llewellyn, K.J., et al. (2014). Disease-specific Induced Pluripotent Stem Cell Modeling: Insights into the Pathophysiology of Valosin Containing Protein (VCP) Disease. *J. Stem Cell Res. Ther.* 4, 1000168.
- DeLaBarre, B., and Brunger, A.T. (2003). Complete structure of p97/valosin-containing protein reveals communication between nucleotide domains. *Nat. Struct. Biol.* 10, 856–863.
- Du, Z.-W., Chen, H., Liu, H., Lu, J., Qian, K., Huang, C.-L., Zhong, X., Fan, F., and Zhang, S.-C. (2015). Generation and expansion of highly pure motor neuron progenitors from human pluripotent stem cells. *Nat. Commun.* 6, 6626.
- Du Rietz, H., Hedlund, H., Wilhelmson, S., Nordenfelt, P., and Wittrup, A. (2020). Imaging small molecule-induced endosomal escape of siRNA. *Nat. Commun.* 11, 1809.
- Eapen, V.V., Swarup, S., Hoyer, M.J., Paulo, J.A., and Harper, J.W. (2021). Quantitative proteomics reveals the selectivity of ubiquitin-binding autophagy receptors in the turnover of damaged lysosomes by lysophagy. *Elife* 10, e72328.
- Ferrari, V., Cristofani, R., Cicardi, M.E., Tedesco, B., Crippa, V., Chierichetti, M., Casarotto, E., Cozzi, M., Mina, F., Galbiati, M., et al. (2022). Pathogenic variants of Valosin-containing protein induce lysosomal damage and transcriptional activation of autophagy regulators in neuronal cells. *Neuropathol. Appl. Neurobiol.* 48, e12818.
- Filipenko, N.R., MacLeod, T.J., Yoon, C.-S., and Waisman, D.M. (2004). Annexin A2 Is a Novel RNA-binding Protein. *J. Biol. Chem.* 279, 8723–8731.
- Franz, A., Ackermann, L., and Hoppe, T. (2016). Ring of Change: CDC48/p97 Drives Protein Dynamics at Chromatin. *Front. Genet.* 7, 73.
- Fujita, N., Morita, E., Itoh, T., Tanaka, A., Nakaoka, M., Osada, Y., Umamoto, T., Saitoh, T., Nakatogawa, H., Kobayashi, S., et al. (2013). Recruitment of the autophagic machinery to endosomes during infection is mediated by ubiquitin. *J. Cell Biol.* 203, 115–128.
- Gonzalez, A.E., and Wang, X. (2020). Drosophila VCP/p97 Mediates Dynein-Dependent Retrograde Mitochondrial Motility in Axons. *Front. Cell Dev. Biol.* 8, 256.
- Ganji, R., Paulo, J.A., Xi, Y., Kline, I., Zhu, J., Clemen, C.S., Wehl, C.C., Purdy, J.G., Gygi, S.P., and Raman, M. (2023). The P97-UBXD8 Complex Modulates ER-Mitochondria Contact Sites by Modulating Membrane Lipid Saturation and Composition. *Nature Communications* 14, 638.
- Gonzalez, M.A., Feely, S.M., Speziani, F., Strickland, A.V., Danzi, M., Bacon, C., Lee, Y., Chou, T.-F., Blanton, S.H., Wehl, C.C., et al. (2014). A novel mutation in VCP causes Charcot-Marie-Tooth Type 2 disease. *Brain* 137, 2897–2902.
- Hall, C.E., Yao, Z., Choi, M., Tyzack, G.E., Serio, A., Luisier, R., Harley, J., Preza, E., Arber, C., Crisp, S.J., et al. (2017). Progressive Motor Neuron Pathology and the Role of Astrocytes in a Human Stem Cell Model of VCP-Related ALS. *Cell Rep.* 19, 1739–1749.
- Harley, J., Hagemann, C., Serio, A., and Patani, R. (2021). TDP-43 and FUS mislocalization in VCP mutant motor neurons is reversed by pharmacological inhibition of the VCP D2 ATPase domain. *Brain Commun.* 3, fcab166.
- Hill, S.M., Wrobel, L., Ashkenazi, A., Fernandez-Estevéz, M., Tan, K., Bürl, R.W., and Rubinsztein, D.C. (2021). VCP/p97 regulates Beclin-1-dependent autophagy initiation. *Nat. Chem. Biol.* 17, 448–455.
- Jia, J., Abudu, Y.P., Claude-Taupin, A., Gu, Y., Kumar, S., Choi, S.W., Peters, R., Mudd, M.H., Allers, L., Salemi, M., et al. (2018). Galectins Control mTOR in Response to Endomembrane Damage. *Mol. Cell* 70, 120–135.e8.
- Jia, J., Claude-Taupin, A., Gu, Y., Choi, S.W., Peters, R., Bissa, B., Mudd, M.H., Allers, L., Pallikkuth, S., Lidke, K.A., et al. (2020). Galectin-3 Coordinates a Cellular System for Lysosomal Repair and Removal. *Dev. Cell* 52, 69–87.e8.
- Johnson, J.O., Mandrioli, J., Benatar, M., Abramzon, Y., Van Deerlin, V.M., Trojanowski, J.Q., Gibbs, J.R., Brunetti, M., Gronka, S.,

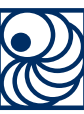

- Wuu, J., et al. (2010). Exome sequencing reveals VCP mutations as a cause of familial ALS. *Neuron* 68, 857–864.
- Ju, J.-S., Fuentealba, R.A., Miller, S.E., Jackson, E., Piwnica-Worms, D., Baloh, R.H., and Weihl, C.C. (2009). Valosin-containing protein (VCP) is required for autophagy and is disrupted in VCP disease. *J. Cell Biol.* 187, 875–888.
- Kato, T., Kurita, K., Seino, T., Kadoya, T., Horie, H., Wada, M., Kawana, T., Daimon, M., and Hirano, A. (2001). Galectin-1 Is a Component of Neurofilamentous Lesions in Sporadic and Familial Amyotrophic Lateral Sclerosis. *Biochem. Biophys. Res. Commun.* 282, 166–172.
- Kim, N.C., Tresse, E., Kolaitis, R.-M., Molliex, A., Thomas, R.E., Alami, N.H., Wang, B., Joshi, A., Smith, R.B., Ritson, G.P., et al. (2013). VCP Is Essential for Mitochondrial Quality Control by PINK1/Parkin and this Function Is Impaired by VCP Mutations. *Neuron* 78, 65–80.
- Kochenova, O.V., Mukkavalli, S., Raman, M., and Walter, J.C. (2022). Cooperative assembly of p97 complexes involved in replication termination. *Nat. Commun.* 13, 6591.
- Kravić, B., Bionda, T., Siebert, A., Gahlot, P., Levantovsky, S., Behrends, C., and Meyer, H. (2022). Ubiquitin profiling of lysophagy identifies actin stabilizer CNN2 as a target of VCP/p97 and uncovers a link to HSPB1. *Mol. Cell* 82, 2633–2649.e7.
- Krick, R., Bremer, S., Welter, E., Schlotterhose, P., Muehe, Y., Eskelinen, E.-L., and Thumm, M. (2010). Cdc48/p97 and Shp1/p47 regulate autophagosome biogenesis in concert with ubiquitin-like Atg8. *J. Cell Biol.* 190, 965–973.
- Leoni, T.B., González-Salazar, C., Rezende, T.J.R., Hernández, A.L.C., Mattos, A.H.B., Coimbra Neto, A.R., da Graça, F.F., Gonçalves, J.P.N., Martinez, A.R.M., Taniguti, L., et al. (2021). A Novel Multisystem Proteinopathy Caused by a Missense ANXA11 Variant. *Ann. Neurol.* 90, 239–252.
- Liao, Y.-C., Fernandopulle, M.S., Wang, G., Choi, H., Hao, L., Drerup, C.M., Patel, R., Qamar, S., Nixon-Abell, J., Shen, Y., et al. (2019). RNA Granules Hitchhike on Lysosomes for Long-Distance Transport, Using Annexin A11 as a Molecular Tether. *Cell* 179, 147–164.e20.
- Magnaghi, P., D’Alessio, R., Valsasina, B., Avanzi, N., Rizzi, S., Asa, D., Gasparri, F., Cozzi, L., Cucchi, U., Orrenius, C., et al. (2013). Covalent and allosteric inhibitors of the ATPase VCP/p97 induce cancer cell death. *Nat. Chem. Biol.* 9, 548–556.
- Manno, A., Noguchi, M., Fukushi, J., Motohashi, Y., and Kakizuka, A. (2010). Enhanced ATPase activities as a primary defect of mutant valosin-containing proteins that cause inclusion body myopathy associated with Paget disease of bone and frontotemporal dementia. *Gene Cell.* 15, 911–922.
- McAlister, G.C., Nusinow, D.P., Jedrychowski, M.P., Wühr, M., Huttlin, E.L., Erickson, B.K., Rad, R., Haas, W., and Gygi, S.P. (2014). MultiNotch MS3 Enables Accurate, Sensitive, and Multiplexed Detection of Differential Expression across Cancer Cell Line Proteomes. *Anal. Chem.* 86, 7150–7158.
- Nalbandian, A., Llewellyn, K.J., Kitazawa, M., Yin, H.Z., Badadani, M., Khanlou, N., Edwards, R., Nguyen, C., Mukherjee, J., Mozaffar, T., et al. (2012). The Homozygote VCPR155H/R155H Mouse Model Exhibits Accelerated Human VCP-Associated Disease Pathology. *PLoS One* 7, e46308.
- Neumann, M., Mackenzie, I.R., Cairns, N.J., Boyer, P.J., Markesbery, W.R., Smith, C.D., Taylor, J.P., Kretschmar, H.A., Kimonis, V.E., and Forman, M.S. (2007). TDP-43 in the Ubiquitin Pathology of Frontotemporal Dementia With VCP Gene Mutations. *J. Neuropathol. Exp. Neurol.* 66, 152–157.
- Pantazis, C.B., Yang, A., Lara, E., McDonough, J.A., Blauwendraat, C., Peng, L., Oguro, H., Kanaujiya, J., Zou, J., Sebesta, D., et al. (2022). A reference human induced pluripotent stem cell line for large-scale collaborative studies. *Cell Stem Cell* 29, 1685–1702.e22.
- Papadopoulos, C., Kirchner, P., Bug, M., Grum, D., Koerver, L., Schulze, N., Poehler, R., Dressler, A., Fengler, S., Arhzaouy, K., et al. (2017). VCP/p97 cooperates with YOD1, UBXD1 and PLAA to drive clearance of ruptured lysosomes by autophagy. *EMBO J.* 36, 135–150.
- Pfeffer, G., Lee, G., Pontifex, C.S., Fanganiello, R.D., Peck, A., Weihl, C.C., and Kimonis, V. (2022). Multisystem Proteinopathy Due to VCP Mutations: A Review of Clinical Heterogeneity and Genetic Diagnosis. *Genes* 13, 963.
- Qu, Q., Li, D., Louis, K.R., Li, X., Yang, H., Sun, Q., Crandall, S.R., Tsang, S., Zhou, J., Cox, C.L., et al. (2014). High-efficiency motor neuron differentiation from human pluripotent stem cells and the function of Islet-1. *Nat. Commun.* 5, 3449.
- Ramanathan, H.N., and Ye, Y. (2012). The p97 ATPase associates with EEA1 to regulate the size of early endosomes. *Cell Res.* 22, 346–359.
- Ramos, D.M., Skarnes, W.C., Singleton, A.B., Cookson, M.R., and Ward, M.E. (2021). Tackling neurodegenerative diseases with genomic engineering: A new stem cell initiative from the NIH. *Neuron* 109, 1080–1083.
- Rescher, U., and Gerke, V. (2004). Annexins – unique membrane binding proteins with diverse functions. *J. Cell Sci.* 117, 2631–2639.
- Ritz, D., Vuk, M., Kirchner, P., Bug, M., Schütz, S., Hayer, A., Bremer, S., Lusk, C., Baloh, R.H., Lee, H., et al. (2011). Endolysosomal sorting of ubiquitylated caveolin-1 is regulated by VCP and UBXD1 and impaired by VCP disease mutations. *Nat. Cell Biol.* 13, 1116–1123.
- Russ, D.E., Cross, R.B.P., Li, L., Koch, S.C., Matson, K.J.E., Yadav, A., Alkaslasi, M.R., Lee, D.I., Le Pichon, C.E., Menon, V., and Levine, A.J. (2021). A harmonized atlas of mouse spinal cord cell types and their spatial organization. *Nat. Commun.* 12, 5722.
- Shimojo, D., Onodera, K., Doi-Torii, Y., Ishihara, Y., Hattori, C., Miwa, Y., Tanaka, S., Okada, R., Ohyama, M., Shoji, M., et al. (2015). Rapid, efficient, and simple motor neuron differentiation from human pluripotent stem cells. *Mol. Brain* 8, 79.
- Smith, B.N., Topp, S.D., Fallini, C., Shibata, H., Chen, H.-J., Troakes, C., King, A., Ticozzi, N., Kenna, K.P., Soragia-Gkazi, A., et al. (2017). Mutations in the vesicular trafficking protein annexin A11 are associated with amyotrophic lateral sclerosis. *Sci. Transl. Med.* 9, eaad9157.
- Tanaka, A., Cleland, M.M., Xu, S., Narendra, D.P., Suen, D.-F., Karbowski, M., and Youle, R.J. (2010). Proteasome and p97 mediate





- mitophagy and degradation of mitofusins induced by Parkin. *J. Cell Biol.* *191*, 1367–1380.
- Thompson, A., Schäfer, J., Kuhn, K., Kienle, S., Schwarz, J., Schmidt, G., Neumann, T., Johnstone, R., Mohammed, A.K.A., and Hamon, C. (2003). Tandem Mass Tags: A Novel Quantification Strategy for Comparative Analysis of Complex Protein Mixtures by MS/MS. *Anal. Chem.* *75*, 1895–1904.
- Ting, L., Rad, R., Gygi, S.P., and Haas, W. (2011). MS3 eliminates ratio distortion in isobaric multiplexed quantitative proteomics. *Nat. Methods* *8*, 937–940.
- Tollervy, J.R., Curk, T., Rogelj, B., Briese, M., Cereda, M., Kayikci, M., König, J., Hortobágyi, T., Nishimura, A.L., Župunski, V., et al. (2011). Characterizing the RNA targets and position-dependent splicing regulation by TDP-43. *Nat. Neurosci.* *14*, 452–458.
- Twomey, E.C., Ji, Z., Wales, T.E., Bodnar, N.O., Ficarro, S.B., Marto, J.A., Engen, J.R., and Rapoport, T.A. (2019). Substrate processing by the Cdc48 ATPase complex is initiated by ubiquitin unfolding. *Science* *365*, eaax1033.
- Wang, F., Li, S., Wang, T.Y., Lopez, G.A., Antoshechkin, I., and Chou, T.F. (2022). P97/VCP ATPase inhibitors can rescue p97 mutation-linked motor neuron degeneration. *Brain Commun.* *4*, fcac176.
- Wani, A., Zhu, J., Ulrich, J.D., Eteleeb, A., Sauerbeck, A.D., Reitz, S.J., Arhzaouy, K., Ikenaga, C., Yuede, C.M., Pittman, S.K., et al. (2021). Neuronal VCP loss of function recapitulates FTLTDP pathology. *Cell Rep.* *36*, 109399.
- Watts, G.D.J., Wymer, J., Kovach, M.J., Mehta, S.G., Mumm, S., Darvish, D., Pestronk, A., Whyte, M.P., and Kimonis, V.E. (2004). Inclusion body myopathy associated with Paget disease of bone and frontotemporal dementia is caused by mutant valosin-containing protein. *Nat. Genet.* *36*, 377–381.
- Wu, J.X., Pascovici, D., Wu, Y., Walker, A.K., and Mirzaei, M. (2020). Workflow for Rapidly Extracting Biological Insights from Complex, Multicondition Proteomics Experiments with WGCNA and PloGO2. *J. Proteome Res.* *19*, 2898–2906.
- Yang, H., and Tan, J.X. (2023). Lysosomal quality control: molecular mechanisms and therapeutic implications. *Trends Cell Biol.* *33*, 749–764.
- Ye, Y., Tang, W.K., Zhang, T., and Xia, D. (2017). A Mighty “Protein Extractor” of the Cell: Structure and Function of the p97/CDC48 ATPase. *Front. Mol. Biosci.* *4*, 39.
- Yim, W.W.-Y., Yamamoto, H., and Mizushima, N. (2022). Annexins A1 and A2 are recruited to larger lysosomal injuries independently of ESCRTs to promote repair. *FEBS Lett.* *596*, 991–1003.
- Zaffagnini, G., and Martens, S. (2016). Mechanisms of Selective Autophagy. *J. Mol. Biol.* *428*, 1714–1724.
- Zhang, T., Mishra, P., Hay, B.A., Chan, D., and Guo, M. (2017). Valosin-containing protein (VCP/p97) inhibitors relieve Mitofusin-dependent mitochondrial defects due to VCP disease mutants. *Elife* *6*, e17834.
- Zhou, H.-J., Wang, J., Yao, B., Wong, S., Djakovic, S., Kumar, B., Rice, J., Valle, E., Soriano, F., Menon, M.-K., et al. (2015). Discovery of a First-in-Class, Potent, Selective, and Orally Bioavailable Inhibitor of the p97 AAA ATPase (CB-5083). *J. Med. Chem.* *58*, 9480–9497.
- Zhou, J.-Y., Afjehi-Sadat, L., Asress, S., Duong, D.M., Cudkowicz, M., Glass, J.D., and Peng, J. (2010). Galectin-3 is a candidate biomarker for ALS: Discovery by a proteomics approach. *J. Proteome Res.* *9*, 5133–5141.
- Zoncu, R., and Perera, R.M. (2022). Built to last: lysosome remodeling and repair in health and disease. *Trends Cell Biol.* *32*, 597–610.

**Stem Cell Reports, Volume 19**

**Supplemental Information**

**ALS-related p97 R155H mutation disrupts lysophagy in iPSC-derived motor neurons**

**Jacob A. Klickstein, Michelle A. Johnson, Pantelis Antonoudiou, Jamie Maguire, Joao A. Paulo, Steve P. Gygi, Chris Weihl, and Malavika Raman**

# **ALS-related p97 R155H mutation disrupts lysophagy in iPSC-derived motor neurons**

## **Supplemental Information**

# Supplementary Figure 1

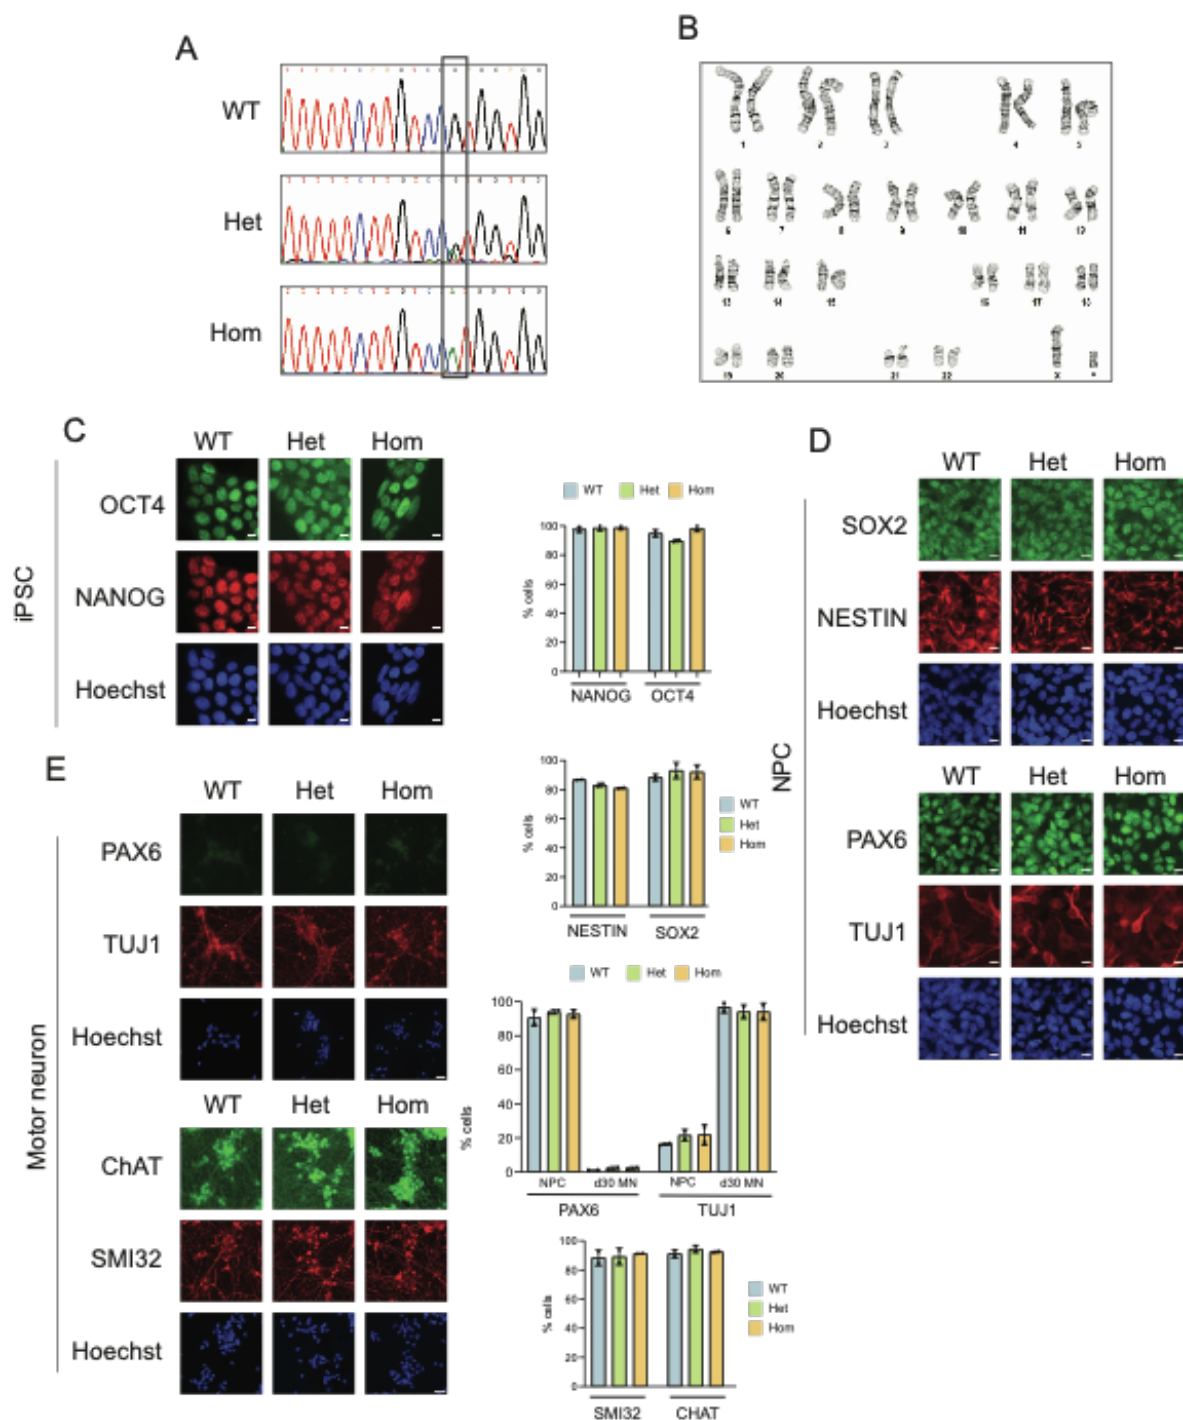

**Figure 1S. p97 mutations do not affect motor neuron differentiation in the KOLF2.1 cell line**

A. Sanger sequencing traces of KOLF2.1 iPSCs confirm WT, heterozygous, and homozygous R155H mutations in the endogenous p97 locus. B. Karyotype of the parental WT KOLF2.1 line shows no macroscopic genetic abnormalities. C. Representative images of iPSCs stained for pluripotency markers OCT4 and NANOG (left panels). Quantification of the percent of cells positive for each marker in each genotype (right). N = 2 independent experiments. Scale bar 10 $\mu$ m. D. Representative images of NPCs stained for NPC markers SOX2, NESTIN, and PAX6 as well as neuronal marker  $\beta$ III-tubulin (TUJ1) (right panels). Quantification of the percent of cells positive for each marker (left middle graphs). N = 2 independent experiments. Scale bar 10 $\mu$ m. E. Representative images of motor neurons stained for the NPC marker PAX6, pan-neuronal marker  $\beta$ III-tubulin (TUJ1), and motor neuron specific markers choline acetyl transferase (ChAT) and neurofilament heavy chain (SMI32) (left panels). Quantification of the percent of cells positive for each marker (left bottom two graphs). N = 2 independent experiments. Scale bar 10 $\mu$ m. All data expressed as means  $\pm$  SEM.

## Supplementary Figure 2

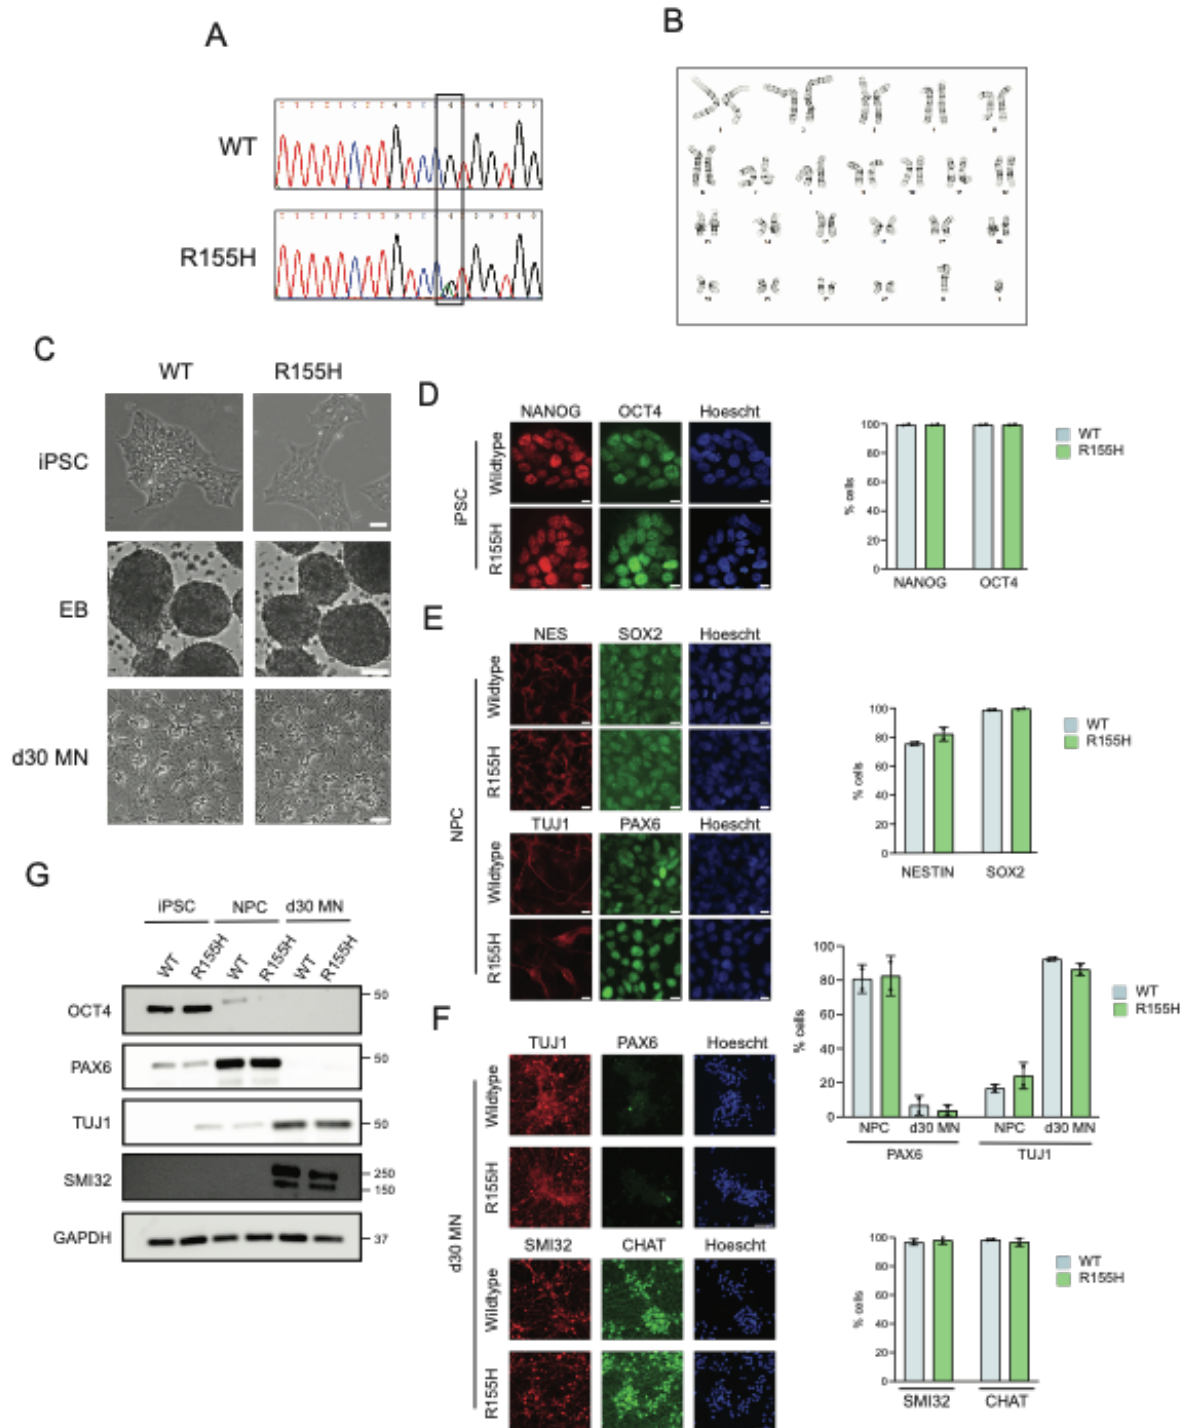

## Figure 2S. Characterizing of 392.1 and p97 corrected iPSC lines and differentiation

A. Sanger sequencing traces of 392.1 iPSCs confirm WT and heterozygous R155H mutation in the endogenous p97 locus. B. Karyotype of 392.1 iPSCs. C. Phase contrast images of iPSC colonies (top panels), embryoid bodies (middle panels), and motor neurons (bottom panels). Scale bars 200 $\mu$ m (middle) and 50 $\mu$ m (top and bottom). D. Representative images of iPSCs stained for pluripotency markers OCT4 and NANOG (left panels). Quantification of the percent of cells positive for each marker in each genotype (right). N = 2 independent experiments. Data expressed as means  $\pm$  SEM. Scale bar 10 $\mu$ m. E. Representative images of NPCs stained for NPC markers SOX2, NESTIN, and PAX6 as well as neuronal marker  $\beta$ III-tubulin (TUJ1) (right panels). Quantification of the percent of cells positive for each marker (left middle graphs). N = 2 independent experiments. Scale bar 10 $\mu$ m. F. Immunoblot of iPSC, NPC, and neuronal markers in each cell type confirms identities. N = 3 independent experiments. G. Representative images of motor neurons stained for the NPC marker PAX6, pan-neuronal marker  $\beta$ III-tubulin (TUJ1), and motor neuron specific markers choline acetyl transferase (ChAT) and neurofilament heavy chain (SMI32) (left panels). Quantification of the percent of cells positive for each marker (left bottom two graphs). N = 2 independent experiments. Scale bar 10 $\mu$ m. All data expressed as means  $\pm$  SEM.

### Supplementary Figure 3

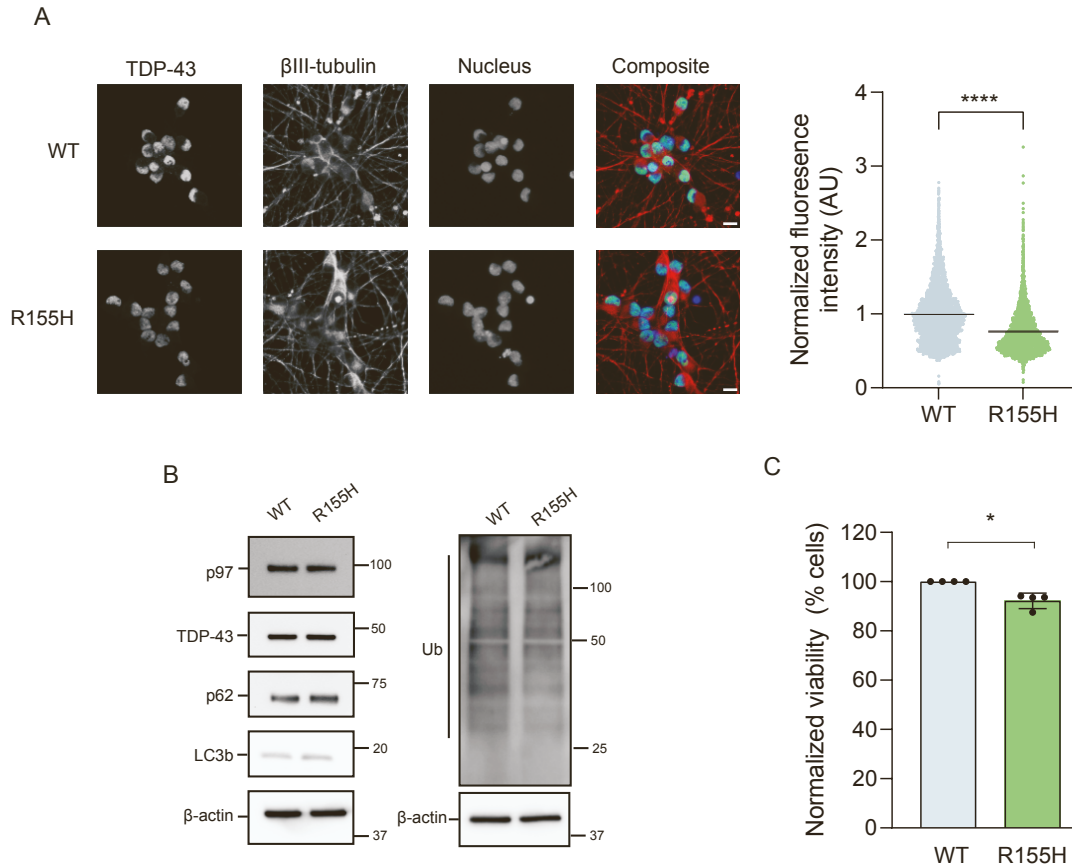

### Figure 3S. Characterization of ALS phenotypes in 392.1 R155H motor neurons

A. Representative images of TDP-43 immunofluorescence in 392.1 motor neurons (left panels). Quantification of nuclear intensity of TDP-43 staining (right). N = >5000 cells per condition over 4 independent experiments. Data points represent individual cells with a line indicating the mean. Scale bar 10 $\mu$ m. B. Immunoblots of p97, TDP-43, autophagy markers (p62 and LC3b), and total ubiquitylated proteins (Ub) show no difference between genotypes. N = 3 independent experiments. C. Normalized viability of 392.1 motor neurons following 30 days of differentiation.



N = 4 independent experiments. All data expressed as means  $\pm$  SEM unless otherwise indicated. \* $p < 0.05$ , \*\*\*\* $p < 0.0001$ . unpaired t test (A, C).

Figure 4

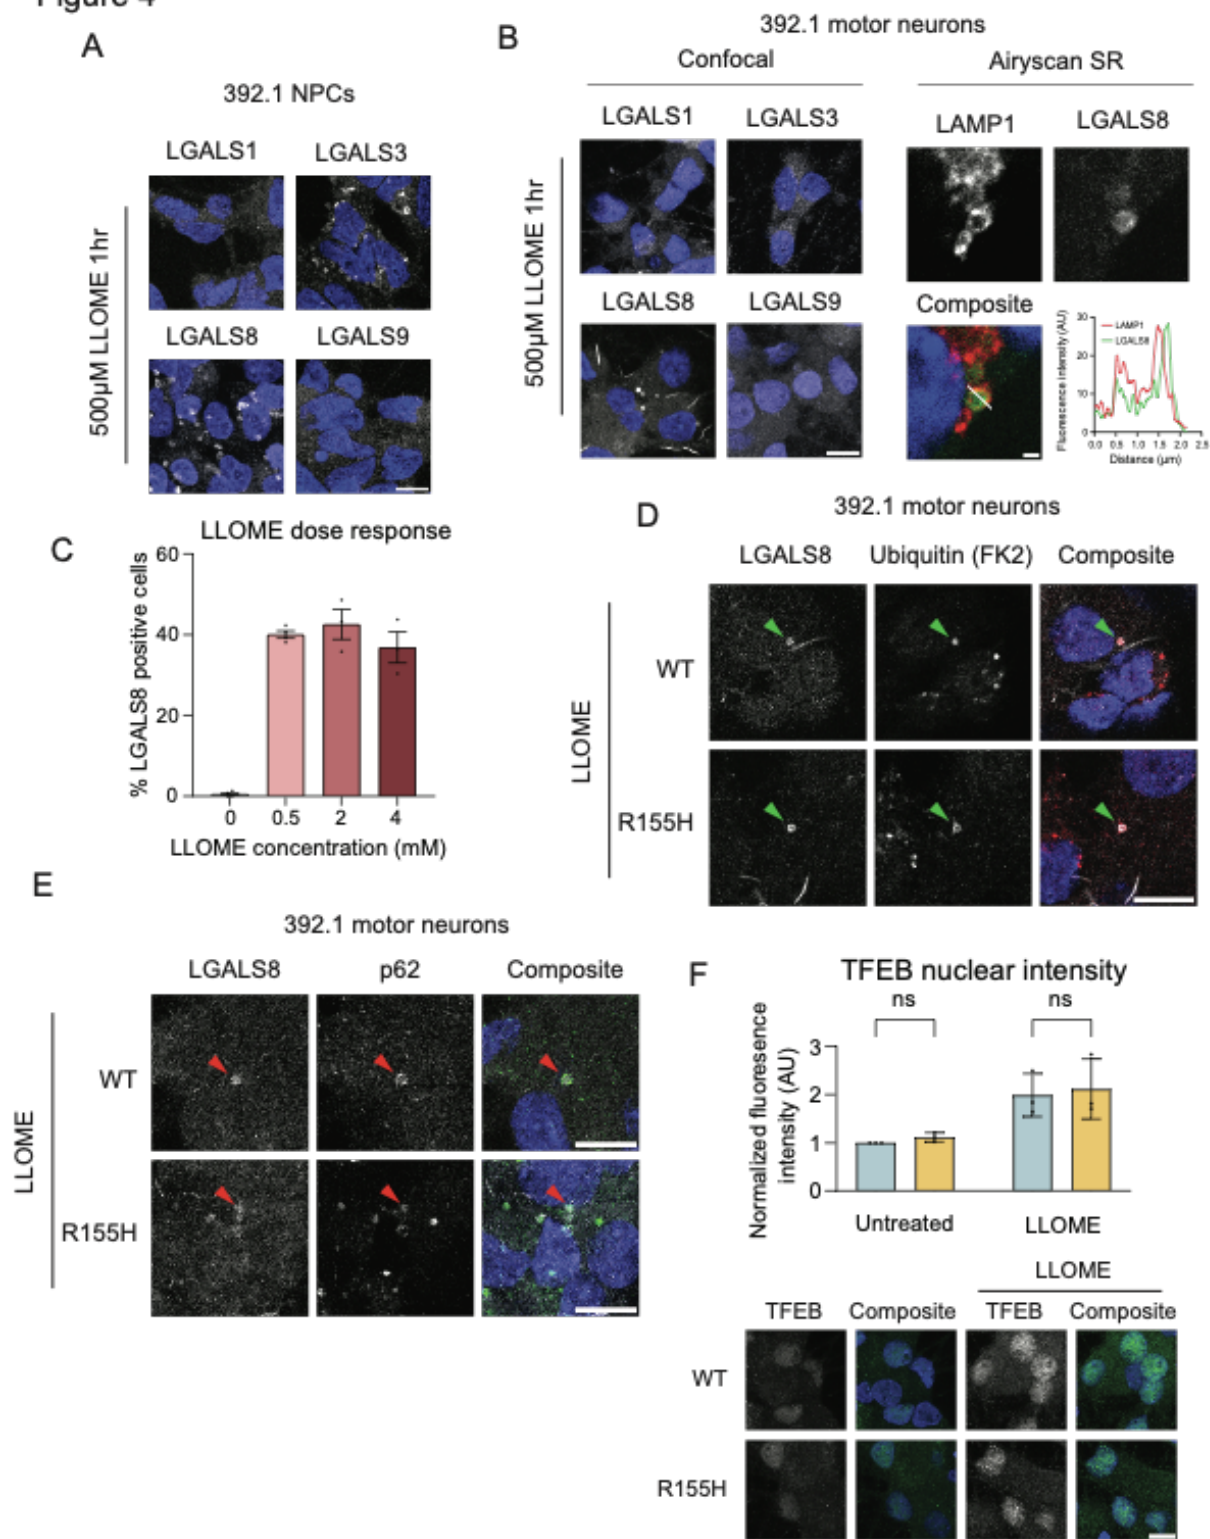

**Figure 4S. Gene ontology of DEPs in R155H motor neurons reveal genetic background specific differences**

A-C. Cluster dendrograms of identified proteins in each experiment indicated (top). Gene ontology terms for enriched and depleted DEPs for each experiment demonstrate divergent proteome changes between cell lines (bottom). D. Heatmap of mitochondrial proteins in KOLF2.1 homozygous motor neurons show wholesale depletion of electron transport chain (ETC) components. E. Validation of the depletion of ETC components TMEM70 and MT-ND2 and translocon components TOMM20 and TOMM70 in KOLF2.1 motor neurons. N = 3 independent experiments. F. Representative images of MitoTracker Red fluorescence in KOLF2.1 motor neurons. Scale bar 10 $\mu$ m. G. Quantification of fluorescence in F. The uncoupling agent carbonyl cyanide p-trifluoromethoxyphenylhydrazone (FCCP) was used to collapse the mitochondrial inner membrane potential as a positive control. N = 4 independent experiments. H. Quantification mitochondrial morphology using MitoTracker Red live cell imaging. All data expressed as means  $\pm$  SEM. \*p<0.05, \*\*p<0.01, \*\*\*p<0.001; one-way ANOVA with Dunnett's multiple comparison test (G, H)

# Supplementary figure 5

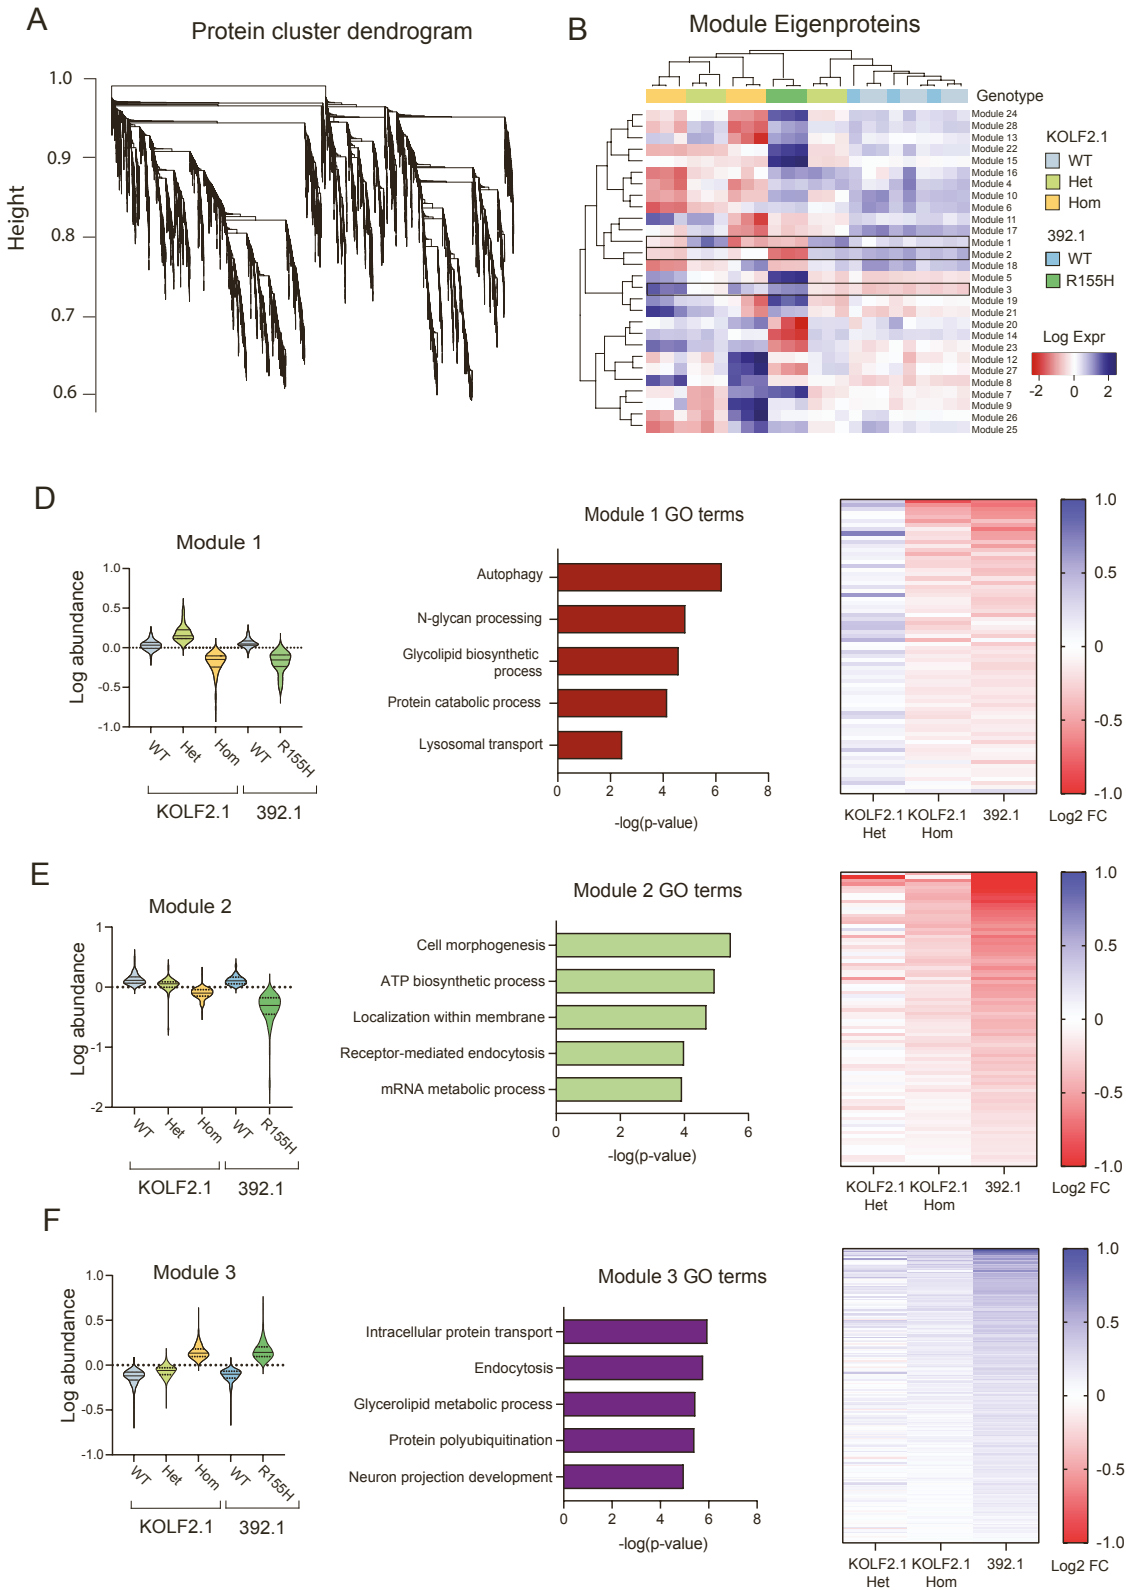

**Figure 5S. Unbiased clustering analysis of KOLF2.1 and 392.1 motor neuron proteomes identify altered pathways related to autophagy and lysosome homeostasis**

A. Weighted gene correlation network analysis (WGCNA) adapted for proteomics experiments was used to cluster all proteins into modules of distinct proteins which are altered in a similar manner between genotypes. B. Heatmap of module eigenproteins for each replicate in each genotype as depicted by color coding above the heatmap. Modules were ranked by concordance and average fold change to identify protein sets changing in a similar manner between cell lines. The top three modules are boxed within the heatmap. D-F. Violin plots of the relative log<sub>2</sub> abundance of member proteins of the top three modules in motor neurons (left). Top 5 enriched gene ontology terms in each of the modules ranked by significance (middle). Heatmaps of the log<sub>2</sub> fold change of member proteins in each module for each genotype expressed as mutant vs WT (right).

Supplementary figure 6

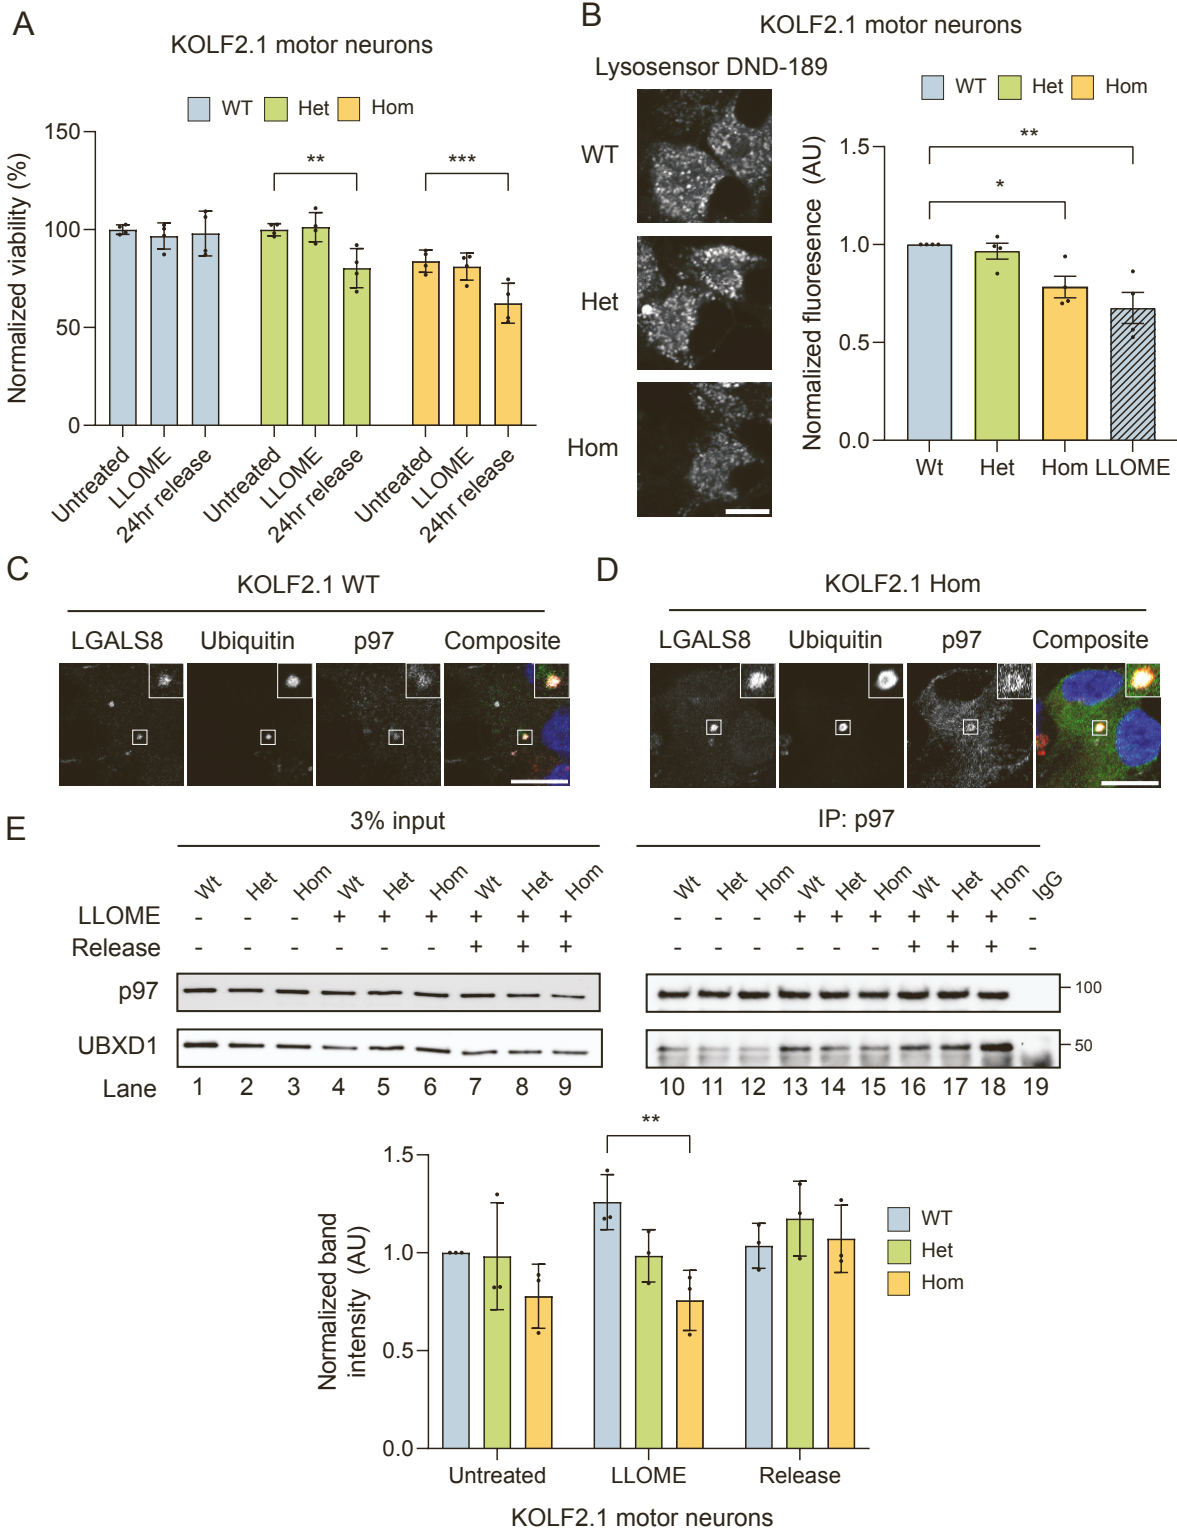

**Figure 6S. Mutant p97 reduces neuronal resilience to LLOME treatment, increases lysosomal pH, and disrupts association to UBXD1 following lysosomal damage**

A. Normalized viability in untreated, LLOME treated or after release in KOLF2.1 motor neurons. N = 4 independent experiments. B. Representative images of LysoSensor DND-189 live cell imaging in KOLF2.1 motor neurons (left). Quantification of DND-189 fluorescence in untreated and LLOME treated cells. N = 4 independent experiments. Scale bar 5  $\mu$ m. C-D. Representative images of wildtype (C) and R155H p97 (D) KOLF2.1 motor neurons co-stained with LGALS8, p97, and ubiquitin showing colocalization. N = 3 independent experiments. Scale bars 10 $\mu$ m. E. Immunoblot of endogenous p97 immunoprecipitation in KOLF2.1 motor neurons before, during, and after LLOME treatment (top). Release condition represents 5 hours of recovery. Quantification of UBXD1 band intensities normalized to immunoprecipitated p97 (left). N = 4 independent experiments. All data expressed as means  $\pm$  SEM. \*\*p<0.01, \*\*\*p<0.001; two-way ANOVA with Dunnett's (A, E) or Sidak's (B) multiple comparison test

# Supplementary figure 7

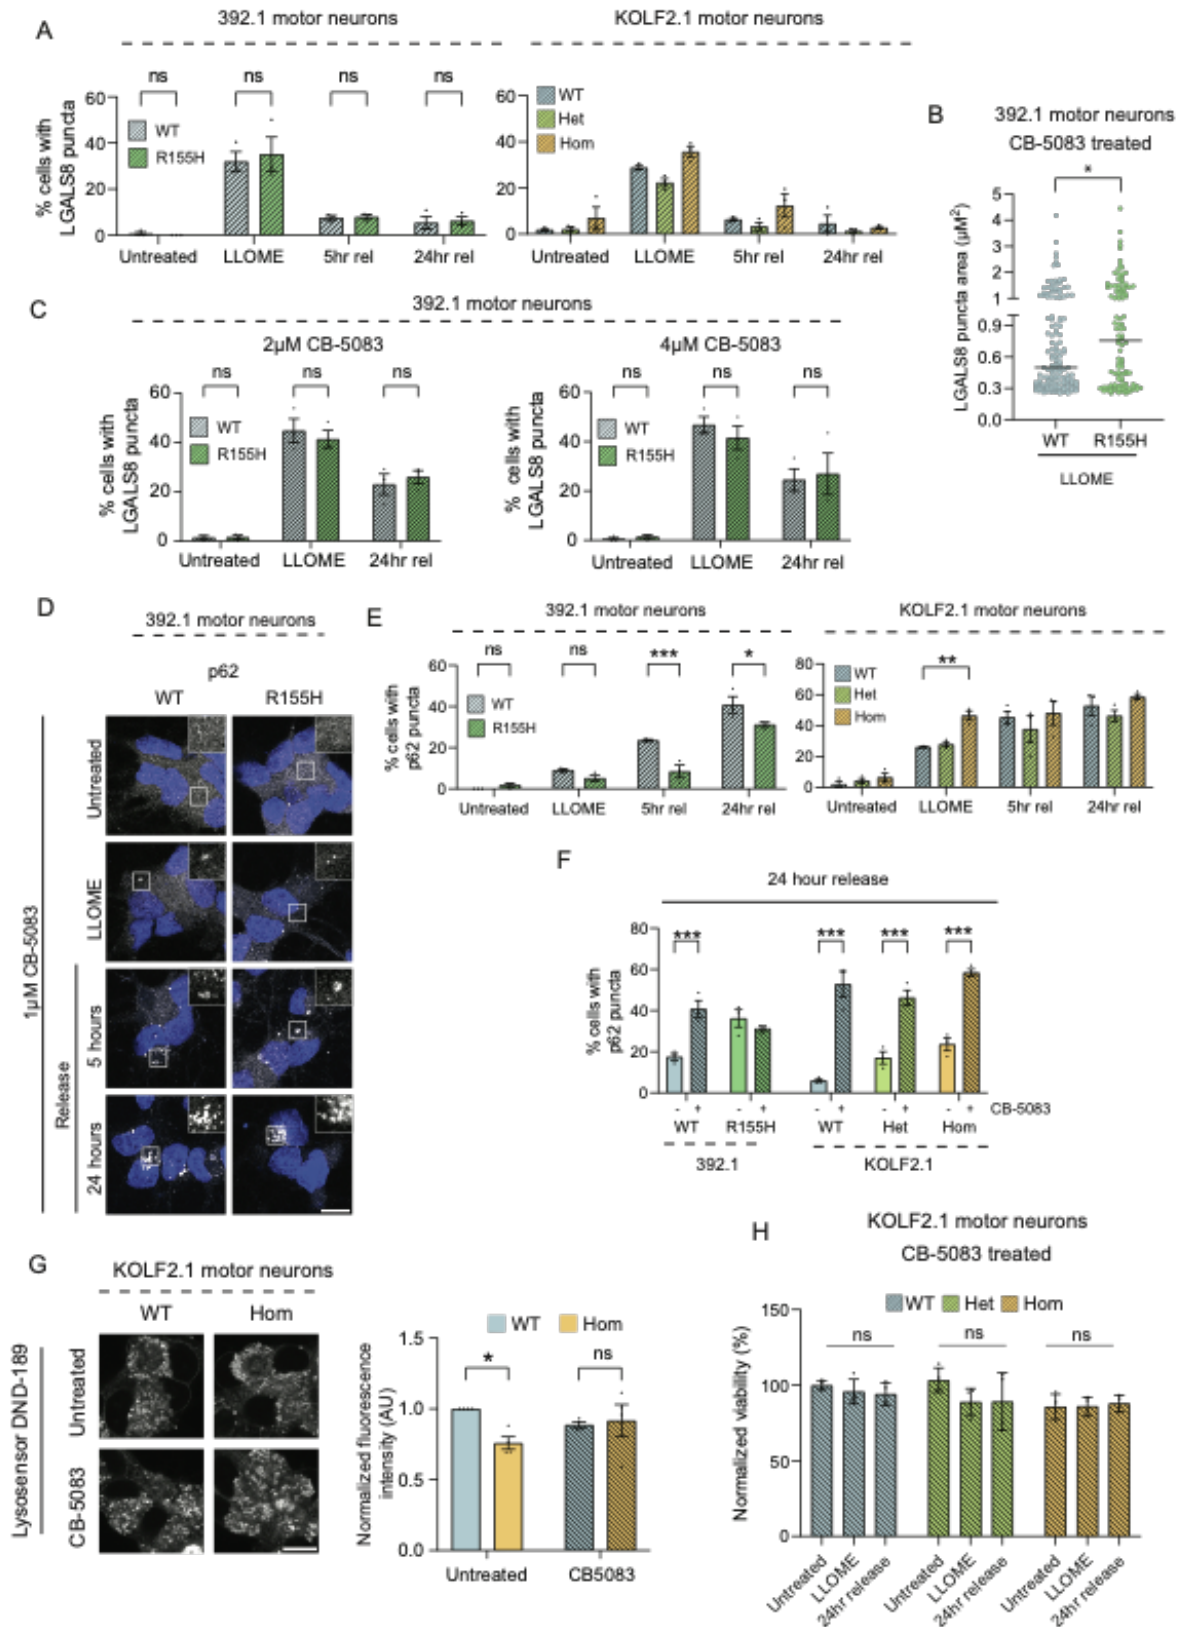



## Figure 7S. p97 inhibition rescues lysosome defects in motor neurons

A. Quantification of LGALS8 puncta in 392.1 (left) and KOLF2.1 (right) motor neurons co-treated with LLOME and CB-5083. N = 3 independent experiments. B. Quantification of LGALS8 puncta area. Data expressed as individual LGALS8 puncta; lines represent means. C. Quantification of cells with LGALS8 puncta in 392.1 motor neurons treated with 2 $\mu$ M (left) and 4 $\mu$ M CB-5083 (right). N = 3 independent experiments. D. Representative images p62 puncta in 392.1 motor neurons before, during, and after LLOME treatment. Scale bar 10 $\mu$ m. E. Quantification of p62 puncta in 392.1 (left) and KOLF2.1 (right) motor neurons co-treated with LLOME and CB-5083. N = 3 independent experiments. F. Comparison of p62 puncta clearance at 24 hours release in motor neurons treated with LLOME (solid bars) or co-treated with LLOME and CB-5083 (shaded bars). N = 3 independent experiments. G. Representative images of Lysosensor DND-189 live-cell imaging in KOLF2.1 motor neurons. Quantification of DND-189 fluorescence in untreated (solid bars) and CB-5083 treated (shaded bars) motor neurons. N = 4 independent experiments. Scale bar 10 $\mu$ m. H. Normalized viability of KOLF2.1 motor neurons treated with CB-5083 in untreated, LLOME treated, or after release. Release condition represents 24 hours of recovery. All data expressed as means  $\pm$  SEM unless otherwise indicated. ns – nonsignificant, \* $p < 0.05$ , \*\* $p < 0.01$ , \*\*\* $p < 0.001$ ; two-way ANOVA with Sidak's (A-left, C, E-left, F, G) or Dunnett's (A-right, E-right, H) multiple comparison test or unpaired t-test (B)

## Supplementary Methods

### Antibodies and chemicals

Antibodies for LGALS1 (11858-1-AP), LGALS3 (14979-1-AP), PAX6 (12323-1-AP), TDP-43 (10782-2-AP), ATF4 (10835-1-AP), TMEM70 (20388-1-AP), TFEB (13372-1-AP), and MT-ND2 (19704-1-AP) were procured from ProteinTech Group. Antibodies for SOX2 (3579T), NANOG (4903T), LC3B (3868T), and Bip (3177T) were procured from Cell Signaling Technologies. Additional antibodies used were TUJ1 (T8660 Sigma), ChAT (ab181023 Abcam), SMI32 (801702 BioLegend), LGALS8 (AF1305 RND Systems), LGALS9 (AF2045 RND Systems), p97 (A300-589A Bethyl (IP) and 612183 BD Biosciences (IF)), ubiquitin (FK2) (04-263 EMD Millipore), LAMP1 (sc-20011 Santa Cruz), GAPDH (sc-47724 Santa Cruz), NESTIN (NBP1-92717SS Novus Biologicals), OCT4 (653701 BioLegend), TOMM20 (sc-17764 Santa Cruz), TOMM70 (sc-390545 Santa Cruz), and p62 (GP62-C Progen Biotechnik). Alex Fluor-conjugated secondary antibodies were from Molecular Probes. Primary antibodies were used at 1:100 for immunofluorescence studies and 1:1000 for immunoblotting. Secondary antibodies were used at 1:5000 for immunofluorescence and immunoblot studies. SB431532 (S1067), Y-27632 (S1049), and SAG1 (S7779) were obtained from Selleck Chem. LDN193189 (SML0559), valproic acid (P4543), BrdU (B9285), PLO (P3655), laminin (L2020), and fibronectin (F2006) were obtained from Sigma-Aldrich. CHIR99021 (4423) was obtained from Tocris. Retinoic acid (sc-200898) was obtained from Santa Cruz. Compound E (565790) was obtained from EMD Millipore. GDNF (450-10), BDNF (450-02), and NT-3 (450-03) were obtained from PeproTech. LLOME (16008) and CB-5083 (19311) were obtained from Cayman Chemicals.

## Media Composition

| Base media | Media type                 | Component     | Concentration |
|------------|----------------------------|---------------|---------------|
| PIE base   | Induction media            | SB-431542     | 10uM          |
|            |                            | LDN-193189    | 1uM           |
|            |                            | CHIR-99021    | 3uM           |
|            | Induction-patterning media | SB-431542     | 10uM          |
|            |                            | LDN-193189    | 1 $\mu$ M     |
|            |                            | CHIR-99021    | 3 $\mu$ M     |
|            |                            | Retinoic acid | 2 $\mu$ M     |
|            |                            | SAG1          | 1 $\mu$ M     |
|            | Expansion media            | CHIR-99021    | 3 $\mu$ M     |
|            |                            | Valproic acid | 5 $\mu$ M     |
|            |                            | Retinoic acid | 0.5 $\mu$ M   |
|            |                            | SAG1          | 1 $\mu$ M     |
|            | Patterning media           | Retinoic acid | 2 $\mu$ M     |
|            |                            | SAG1          | 1 $\mu$ M     |
| 3M base    | Maturation media           | Retinoic acid | 1 $\mu$ M     |
|            |                            | SAG1          | 0.5 $\mu$ M   |
|            |                            | BDNF          | 20 ng/mL      |
|            |                            | GDNF          | 20 ng/mL      |
|            |                            | NT-3          | 10 ng/mL      |
|            |                            | Compound E    | 0.2 $\mu$ M   |
|            |                            | Laminin       | 1 $\mu$ g /mL |

Table 1

| Base media | Component | Concentration | Source | Identifier |
|------------|-----------|---------------|--------|------------|
|------------|-----------|---------------|--------|------------|

|                                                      |                          |               |         |            |
|------------------------------------------------------|--------------------------|---------------|---------|------------|
| Patterning,<br>induction,<br>expansion base<br>(PIE) | DMEM/F12                 | 50%           | Cytiva  | SH30023.FS |
|                                                      | Neurobasal plus          | 50%           | Thermo  | A3582901   |
|                                                      | N-2 supplement           | 0.5x          | Thermo  | 17502048   |
|                                                      | B27 plus supplement      | 0.5x          | Thermo  | A3582801   |
|                                                      | GlutaMax                 | 1x            | Thermo  | 35050061   |
|                                                      | NEAA                     | 1x            | Thermo  | 11140050   |
|                                                      | Penicillin/streptomycin  | 1x            | Caisson | PSL01      |
|                                                      | Insulin                  | 5ug/mL        | Sigma   | 91077C     |
|                                                      | $\beta$ -mercaptoethanol | 100 $\mu$ M   | Gibco   | 21985023   |
| Motor neuron<br>maturation<br>media (3M)<br>base     | Neurobasal plus          | 100%          | Thermo  | A3582901   |
|                                                      | N-2 supplement           | 0.5x          | Thermo  | 17502048   |
|                                                      | B27 plus supplement      | 0.5x          | Thermo  | A3582801   |
|                                                      | GlutaMax                 | 1x            | Thermo  | 35050061   |
|                                                      | NEAA                     | 1x            | Thermo  | 11140050   |
|                                                      | Penicillin/streptomycin  | 1x            | Caisson | PSL01      |
|                                                      | Insulin                  | 5 $\mu$ g /mL | Sigma   | 91077C     |
|                                                      | $\beta$ -mercaptoethanol | 100 $\mu$ M   | Gibco   | 21985023   |

Table 2

### Western blot

Cells were removed from plates using ReLeSR (IPSCs), 0.05 % trypsin-EDTA (NPCs), or pipetting (motor neurons), centrifuged at 600 x g for 5 minutes, and supernatant removed. Cell pellets were stored at -80 °C until used. Pellets were lysed in RIPA buffer (150 mM NaCl, 50 mM Tris Cl, 0.5 % sodium deoxycholate, 0.1 % SDS, 1% NP-40) supplemented with 1x

HALT protease inhibitor (PI-78425 Thermo) and incubated on ice for 10 minutes. Lysates were sonicated at 15% power for 5 seconds, 3 times with 2 second pauses. Lysates were then centrifuged at 21,000 x g at 4 °C for 15 minutes to pellet cell debris. Clarified lysates were transferred to clean microcentrifuge tubes and either frozen at -80°C or used immediately for further assays. Total protein was measured using the BCA assay (23225 Thermo). Protein levels between samples were equalized, mixed with 5x Laemmli buffer (250 mM tris, 25 %  $\beta$ -mercaptoethanol, 50 % glycerol, 20% SDS, 0.05% bromophenol blue), and boiled for 5 minutes at 95C. An equal amount of sample was loaded and separated on a 12% bis-tris gel and transferred to PVDF membranes (1620177 Bio-Rad) using a Bio-Rad cassette at 70 volts for 2 hours. Membranes were blocked in 5 % milk in tris buffered saline containing 0.1% tween 20 (TBS-T) for 1 hour at room temperature. Primary antibodies were diluted in 2 % BSA (A-420-500 GoldBio) in TBS-T to the indicated concentration and incubated with membranes overnight at 4C with rocking. Membranes were washed 3 times with TBS-T for 10 minutes each while rocking at room temperature. Secondary antibodies were diluted in 2% BSA in TBS-T and incubated with membranes at 1:5000 for 1 hour at room temperature with rocking. Membranes were washed 3 times as described previously, developed with Clarity ECL substrate (1705061 Bio-Rad), and imaged with a ChemiDoc MP Imaging system (BioRad). Blot densities were analyzed using ImageJ.

### **LLOME treatment**

LLOME was reconstituted to 500mM in sterile DMSO and aliquoted for storage at -20 °C. LLOME was diluted in fresh media immediately before being added to cells. Cells were incubated at the indicated concentrations for the indicated times after which they were washed

once with PBS and fixed or fresh media was added for release time points. CB-5083 was reconstituted to 10 mM in sterile DMSO and aliquoted for storage. Fresh aliquots were thawed before each experiment and added directly to complete media to a final concentration of 1 $\mu$ M.

Slides were imaged with either Nikon TI2 Eclipse epifluorescent microscope 40X or 100X objectives using NIS acquisition software (Figures 1, 2, S1, and S2) or Zeiss LSM880 confocal microscope 63X oil objective using ZenBlue software (all others). Image analysis was performed using a modified version of the AggreCount ImageJ macro<sup>75</sup> or custom ImageJ macros.

## **Immunofluorescence**

Starting on day 9 of differentiation, cells were plated on acid-washed (1 M HCl 4 hours with rocking) # 1.5 glass coverslips that were triple coated (PLO/laminin/fibronectin). Cells were maintained as previously described. Cells were fixed in ice cold 4 % PFA (15710-S Electron Microscopy Sciences) diluted in PBS for 20 minutes. Coverslips were washed once in PBS and incubated in blocking buffer (2 % BSA, 0.2 % Triton-X100 (Figures 1, 2, S1, S2, and S3) or 2 % BSA, 0.4 % saponin (Figures 4, 5, 6, 7, S6, and S7) in PBS) for 1 hour at room temperature. Primary antibodies were diluted to the indicated concentrations in blocking buffer and coverslips were incubated overnight at 4 °C in a humidified chamber. Coverslips were then washed once in blocking buffer and incubated in secondary antibodies diluted to the indicated concentrations in blocking buffer for 1 hour at room temperature. The secondary antibody solution was replaced with Hoechst diluted in PBS and incubated for 5 minutes at room temperature. Coverslips were washed once with PBS and mounted to slides with ProLong Gold antifade mounting media (P36930 Invitrogen).

## **Immunoprecipitation**

Pellets were lysed in mammalian cell lysis buffer (50 mM Tris Cl, 150 mM NaCl, 0.2 % NP-40, HALT), incubated on ice for 10 minutes, and centrifuged at 21,000 x g for 15 minutes at 4 °C. Clarified lysate was transferred to clean microcentrifuge tubes and total protein was measured using the BCA assay. A small portion of the lysate was set aside as the input, and equal amounts of protein were added to washed protein G beads (20398 Thermo) with the indicated antibody (0.5 µg antibody/ 500 µg of lysate). Samples were incubated at 4 °C overnight while rocking. They were centrifuged at 400 x g for 1 minute at 4C, supernatant was removed, and beads were washed with lysis buffer 3 times. 2X Laemmli buffer was added to samples and boiled for 5 minutes at 95 °C. Samples were centrifuged at 400 x g for 1 minute to pellet the beads and remaining supernatant was analyzed by western blot as previously described.

## **Electrophysiology**

WT and homozygous KOLF2.1 motor neurons were perfused in normal artificial cerebral spinal fluid (nACSF) containing (in mM) 126 NaCl, 26 NaHCO<sub>3</sub>, 1.25 NaH<sub>2</sub>PO<sub>4</sub>, 2.5 KCl, 2 CaCl<sub>2</sub>, 2 MgCl<sub>2</sub>, and 10 dextrose (300–310 mosM) and bubbled with 95% O<sub>2</sub>-5% CO<sub>2</sub>. Neurons were recorded under physiological temperature maintained at 33°C (in-line heater; Warner Instruments) and perfused at a high flow rate (~4 ml/min) throughout the experiment. Input-output curves were generated as previously described<sup>76,77</sup>. Whole cell patch clamp recordings on visually identified motor neurons were performed in the current-clamp configuration using an intracellular recording solution containing (in mM) 130 K-

gluconate, 10 KCl, 4 NaCl, 10 HEPES, 0.1 EGTA, 2 Mg-ATP, and 0.3 Na-GTP (pH = 7.25, 280–290 mosM). The resting membrane potential and input resistance was calculated using Ohm's law in response to a –100-pA current injection. The presence of spontaneous action potentials was evaluated during a 2-min baseline recording period. The number of action potentials generated in response to a series of 500-ms current injections from 10 to 150 pA in 10-pA steps was measured to generate input-output curves. Series resistance and whole cell capacitance were continually monitored and compensated throughout the course of the experiment. Recordings were eliminated from data analysis if series resistance increased by >20%. For all electrophysiology experiments, data acquisition was carried out using an Axopatch 200B (Axon Instruments) and PowerLab hardware and software (ADInstruments). Data analysis was performed using analysis scripts developed in-house using Python.

## **qPCR**

Total RNA from KOLF2.1 iPSCs, NPCs and d30 motor neurons was harvested and purified using the Quick RNA miniprep kit (R1054 Zymo) following the manufacturer guidelines. Complementary DNA (cDNA) was created for each sample from equal amounts of total RNA using the iScript cDNA synthesis kit (1708890 BioRad). Real-time PCR was performed from cDNA on a StepOnePlus Real-Time PCR System (Applied Biosystems) using the PowerUp SYBR Green Master Mix (A25741 Thermo). Results were quantified using the  $\Delta\Delta CT$  method. Signals from samples were normalized against the housekeeping genes, GAPDH or 18s.

Primers sequences are as follows:

18s Forward 5'-GGCCCTGTAATTGGAATGAGTC-3'  
18s Reverse 5'-CCAAGATCCAACACTACGAGCTT  
Oct4 Forward 5'-GAAACCCACACTGCAGATCA-3'  
Oct4 Reverse 5'-CGGTTACAGAACCACACTCG-3'



Pax6 Forward 5'-CCCACACTCTTTATCTCTCACTC-3'  
Pax6 Reverse 5'-AGTTGCTGGTGAGAGTTTTCT-3'  
ChAT Forward 5'-CCTGCAGTGCATGCGACAC-3'  
ChAT Reverse 5'-AAACTGCTGCACAATGGCCT-3'

### **TMT proteomic sample preparation**

Samples were collected by aspirating media and pipetting cells off with ice cold PBS. Cells were spun at 600 x g for 5 minutes at 4 °C, the supernatant was removed, and cells were stored at -80 °C. Cell pellets were lysed with 8 M urea supplemented with 1x HALT in 200 mM EPPS (E0276 Sigma) by pipetting up and down 10 times. Samples were passed through a 26g syringe 10 times to shear membranes and centrifuged at 21,000 x g for 10 minutes to pellet debris. The supernatant was transferred to clean microcentrifuge tubes and total protein was estimated using the BCA assay. 100 µg of protein was aliquoted from each sample and the volumes were made equal with lysis buffer. Samples were reduced with 5 mM TCEP for 30 minutes, alkylated with 14 mM iodoacetamide for 30 minutes, and the reaction was quenched with 5 mM DTT for 15 minutes all at room temperature in the dark. Protein was precipitated by adding 400 µL methanol, 100 µL chloroform, and 300 µL water and centrifuging 21,000 x g for 2 minutes at room temperature. The organic and aqueous layers were aspirated, and the remaining protein was allowed to air dry for 5-10 minutes. The protein precipitate was resuspended in 100 µL of 200 mM EPPS. 1 µg/µg of Lys-C (129-02541 Wako) was added to each sample and incubated overnight at room temperature with shaking. Samples were further digested with 1 µg/µg trypsin (90305 Thermo) per sample for 6 hours at 37 °C with shaking. 30 µL of anhydrous acetonitrile was added to each sample. Samples were labeled with 10-plex TMT labeling reagents (90110 Thermo) at 1:10 for 1 hour at room temperature. The labeling reaction was quenched with 10µL 5% hydroxylamine in 200mM EPPS for 15 minutes. TMT-

labeled peptides from each sample were combined in equal amounts. The pooled sample was dried under vacuum.

The sample was resuspended in 5% formic acid for 15 minutes. The peptide mix was desalted using C18 solid-phase extraction (SPE) (WAT036945 Waters). This sample was then fractionated using off-line basic pH reverse-phase fractionation via high performance liquid chromatography (HPLC). The peptide mix was fractionated in 96 fractions which were combined into a total of 24 fractions. These fractions were further desalted using STAGE tips made from C18 resin and p200 pipette tips and dried under vacuum. They were reconstituted in 5% acetonitrile / 1% formic acid for LC-MS/MS processing. An Orbitrap Lumos mass spectrometer coupled with a Proxeon NanoLC-1000 UHPLC was used for data collection. Proteins were identified using all entries from the Human UniProt Database (2018). Peptide-spectrum matches were adjusted to a 1% false discovery rate. Raw protein abundances were determined by summing reporter ion counts across all matching peptides. The abundances were adjusted for protein loading and scaled to generate a relative abundance measurement.

### **Proteomic data analysis**

Log<sub>2</sub> fold changes and adjusted p values were calculated using a modified linear modeling for microarray data as an empirical Bayes procedure using a custom R script<sup>78</sup>. Weighted gene co-expression analysis (WGCNA) was performed as previously described using a modified version of the WGCNA R script<sup>41</sup>. In brief, relative abundances were normalized using sample loading normalization and internal reference scaling to eliminate variation between proteomics experiments. Normalized abundances were used to build a topological overlap distance matrix which was clustered using the TOM-based dissimilarity

method. Modules were identified via a dynamic tree cutting algorithm. These modules were ranked based via concordance between cell line (KOLF2.1 Hom and 392.1 R155H) and average  $\log_2$  FC. The three highest ranked modules were used for gene ontology analysis using Metascape to identify enriched pathways<sup>79</sup>.
